# Supplementary material for: Cobalt(iii)-catalyzed site-selective C–H amidation of pyridones and isoquinolones
Source: Royal Society of Chemistry journal article supplement (doi:10.1039/c8ra06716c), 2018-01-01

## ***Supporting Information***

### **Cobalt(III)-Catalyzed Site-Selective C-H Amidation of Pyridones and Isoquinolones**

Feng Gao<sup>a,b,c</sup>, Xu Han<sup>a,b,c</sup>, Chunpu Li<sup>a,b</sup>, Lingjun Liu<sup>a,d</sup>, Zhanqing Cong<sup>a,e</sup>, Hong Liu<sup>a,b,c,\*</sup>

<sup>a</sup> State Key Laboratory of Drug Research, Shanghai Institute of Materia Medica, Chinese Academy of Sciences, 555 Zu Chong Zhi Road, Shanghai, 201203, China.

<sup>b</sup> Key Laboratory of Receptor Research, Shanghai Institute of Materia Medica, Chinese Academy of Sciences, 555 Zu Chong Zhi Road, Shanghai, 201203, China.

<sup>c</sup> University of Chinese Academy of Sciences, No.19A Yuquan Road, Beijing 100049, China.

<sup>d</sup> School of Pharmacy, China Pharmaceutical University, Jiangsu, Nanjing 210009, China.

<sup>e</sup> School of Life Science and Technology, ShanghaiTech University, 100 Haik Road, Shanghai 201210, China.

## ***Table of Contents***

|                                    |    |
|------------------------------------|----|
| 1. General information .....       | 2  |
| 2. Experimental Procedures.....    | 2  |
| 3. Mechanistic investigations..... | 14 |
| 4. References.....                 | 16 |
| 5. NMR spectra.....                | 17 |

## 1. General Information

Unless otherwise noted, the reagents (chemicals) were purchased from commercial sources, and used without further purification. Water was deionized before used. Analytical thin layer chromatography (TLC) was HSGF 254 (0.15-0.2 mm thickness). Compound spots were visualized by UV light (254 nm). Column chromatography was performed on silica gel FCP 200-300. NMR spectra were run on 400 or 500 MHz instrument. Chemical shifts were reported in parts per million (ppm,  $\delta$ ) downfield from tetramethylsilane. Proton coupling patterns are described as singlet (s), doublet (d), triplet (t), quartet (q), multiplet (m), and broad (br). Low- and high-resolution mass spectra (LRMS and HRMS) were measured on spectrometer. Melting points were measured on melting point apparatus.

## 2. Experimental Procedures

### General procedure for synthesis of 1-(2-Pyridyl)-2-pyridones 1<sup>1</sup>

Synthesis of **1a** is representative. To a solution of 2-hydroxypyridine (950 mg, 10 mmol), copper(I) iodide (95 mg, 0.5 mmol), *N,N'*-dimethylethylenediamine (DMEDA, 0.1 mL, 1 mmol) and potassium phosphate (4.2 g, 20 mmol) in toluene (20 mL) were added 2-bromopyridine (1.9 mL, 20 mmol). The resulting mixture was stirred at 120 °C for 24 h under argon. Then the resulting mixture was cooled to room temperature and diluted with ethyl acetate. A small amount of ethylenediamine was added to dissolve the copper salts and then the mixture was filtered. The organic layer was washed with brine, dried over anhydrous Na<sub>2</sub>SO<sub>4</sub>, filtered and concentrated under reduced pressure. The residue was purified by flash chromatography (PE/EA = 2/1- 1/1) to give **1a** in 70% yield.

### General procedures for cobalt(III)-catalyzed site-selective C-H amidation of pyridones.

Synthesis of **3a** is representative. A Schlenk tube equipped with a magnetic stir bar was charged with 2*H*-[1,2'-bipyridin]-2-one **1a** (0.2 mmol), phenyl oxazolone **2a** (0.60 mmol), Cp\*Co(CO)I<sub>2</sub> (10 mol%), AgSbF<sub>6</sub> (20 mol%) and KOAc (30 mol%) and then capped with septa. 2 mL of DCM was charged to the vial via syringe, and then the resulting mixture was stirred in a pre-heated oil bath at 90 °C for 12 h. After the reaction was completed, solvent was removed under vacuum and the residue was purified by silica gel column using 2% methanol in DCM as eluent to afford desired amidated product **3a** as a white solid.

#### *N*-(2-oxo-2*H*-[1,2'-bipyridin]-6-yl)benzamide (**3a**)

Compound **3a** was prepared as described in general procedure for cobalt(III)-catalyzed site-selective C-H amidation of pyridones. White solid, 56.5 mg, 97% yield. Mp: 153-155 °C. <sup>1</sup>H NMR (400 MHz, DMSO-*d*<sub>6</sub>)  $\delta$  10.30 (s, 1H), 8.58 – 8.50 (m, 1H), 7.90 (td, *J* = 7.7, 1.9 Hz, 1H), 7.60 (dd, *J* = 9.3, 7.1 Hz, 1H), 7.47 (dt, *J* = 8.6, 4.4 Hz, 3H), 7.42 – 7.33 (m, 4H), 6.51 – 6.45 (m, 1H), 6.39 (dd, *J* = 7.1, 1.0 Hz, 1H). <sup>13</sup>C NMR (126 MHz, DMSO-*d*<sub>6</sub>)  $\delta$  165.8, 162.4, 150.4, 148.7, 141.0, 140.8, 138.0, 133.1, 131.9, 128.3, 127.3, 124.5, 124.0, 118.4, 104.0. HRMS (ESI) [M-H]<sup>+</sup> calcd for C<sub>17</sub>H<sub>12</sub>N<sub>3</sub>O<sub>2</sub>: 290.0935, found: 290.0934.

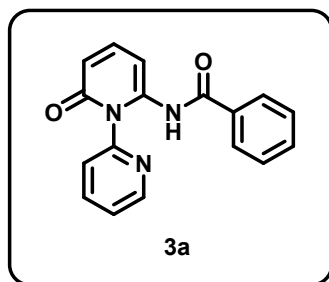

***N*-(3-methyl-2-oxo-2*H*-[1,2'-bipyridin]-6-yl)benzamide (3b)**

Compound **3b** was prepared as described in general procedure for cobalt(III)-catalyzed site-selective C-H amidation of pyridones. White solid, 56.8 mg, 93% yield. Mp: 195-198 °C. <sup>1</sup>H NMR (400 MHz, DMSO-*d*<sub>6</sub>) δ 10.24 (s, 1H), 8.55 – 8.53 (m, 1H), 7.89 (td, *J* = 7.6, 2.0 Hz, 1H), 7.50 – 7.44 (m, 4H), 7.41 – 7.34 (m, 4H), 6.28 (d, *J* = 7.6 Hz, 1H), 2.06 (s, 3H). <sup>13</sup>C NMR (126 MHz, DMSO-*d*<sub>6</sub>) δ 165.9, 162.6, 150.7, 148.7, 138.0, 137.8, 137.4, 132.9, 131.9, 128.3, 127.5, 127.3, 124.4, 123.9, 104.2, 16.7. HRMS (ESI) [*M*-H]<sup>−</sup> calcd for C<sub>18</sub>H<sub>14</sub>N<sub>3</sub>O<sub>2</sub>: 304.1092, found: 304.1087.

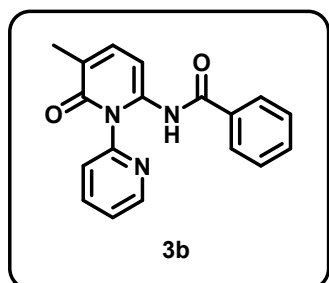

***N*-(3-methoxy-2-oxo-2*H*-[1,2'-bipyridin]-6-yl)benzamide (3c)**

Compound **3c** was prepared as described in general procedure for cobalt(III)-catalyzed site-selective C-H amidation of pyridones. White solid, 45.0 mg, 70% yield. Mp: 243-245 °C. <sup>1</sup>H NMR (400 MHz, DMSO-*d*<sub>6</sub>) δ 10.14 (s, 1H), 8.55 – 8.53 (m, 1H), 7.89 (td, *J* = 7.6, 2.0 Hz, 1H), 7.49 – 7.44 (m, 3H), 7.41 – 7.32 (m, 4H), 6.97 (d, *J* = 8.0 Hz, 1H), 6.27 (d, *J* = 8.0 Hz, 1H), 3.79 (s, 3H). <sup>13</sup>C NMR (126 MHz, DMSO-*d*<sub>6</sub>) δ 166.2, 157.5, 150.4, 148.8, 148.7, 138.1, 133.0, 131.8, 131.2, 128.3, 127.3, 124.2, 124.0, 113.2, 103.8, 55.8. HRMS (ESI) [*M*-H]<sup>−</sup> calcd for C<sub>18</sub>H<sub>14</sub>N<sub>3</sub>O<sub>3</sub>: 320.1041, found: 320.1043.

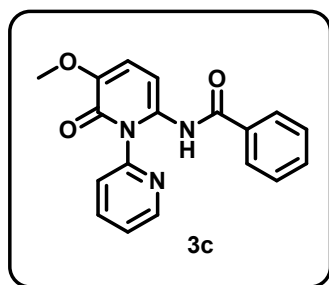

***N*-(3-fluoro-2-oxo-2*H*-[1,2'-bipyridin]-6-yl)benzamide (3d)**

Compound **3d** was prepared as described in general procedure for cobalt(III)-catalyzed site-selective C-H amidation of pyridones. White solid, 41.2 mg, 73% yield. Mp: 242-243 °C. <sup>1</sup>H NMR (400 MHz, DMSO-*d*<sub>6</sub>) δ 10.32 (s, 1H), 8.57 – 8.56 (m, 1H), 7.94 (td, *J* = 8.0, 1.6 Hz, 1H), 7.61 (t, *J* = 8.0 Hz, 1H), 7.51 – 7.41 (m, 5H), 7.39 – 7.36 (m, 2H), 6.37 - 6.34 (m, 1H). <sup>13</sup>C NMR (126 MHz, DMSO-*d*<sub>6</sub>) δ 166.0, 155.7 (d, *J* = 26.5 Hz), 150.6 (d, *J* = 245.7 Hz), 149.5, 149.0, 138.4, 136.2, 136.1, 132.7, 132.0, 131.2, 128.3, 128.2, 127.4, 127.3, 124.5, 124.2, 121.3 (d, *J* = 17.6 Hz), 102.8

(d,  $J = 5.0$  Hz). **HRMS** (ESI)  $[M-H]^-$  calcd for  $C_{17}H_{11}FN_3O_2$ : 308.0841, found: 308.0834.

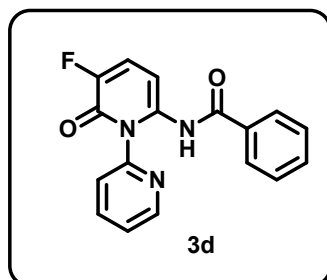

***N*-(3-chloro-2-oxo-2*H*-[1,2'-bipyridin]-6-yl)benzamide (3e)**

Compound **3e** was prepared as described in general procedure for cobalt(III)-catalyzed site-selective C-H amidation of pyridones. White solid, 63.8 mg, 98% yield. Mp: 229-231 °C. **<sup>1</sup>H NMR** (400 MHz, DMSO- $d_6$ )  $\delta$  10.37 (s, 1H), 8.57 – 8.56 (m, 1H), 7.97 – 7.92 (m, 2H), 7.52 – 7.43 (m, 5H), 7.39 – 7.36 (m, 2H), 6.45 (d,  $J = 8.0$  Hz, 1H). **<sup>13</sup>C NMR** (126 MHz, DMSO- $d_6$ )  $\delta$  165.9, 158.4, 149.9, 148.9, 139.8, 139.0, 138.4, 132.6, 132.2, 128.4, 127.4, 124.5, 124.3, 122.9, 104.1. **HRMS** (ESI)  $[M-H]^-$  calcd for  $C_{17}H_{11}ClN_3O_2$ : 324.0545, found: 324.0545.

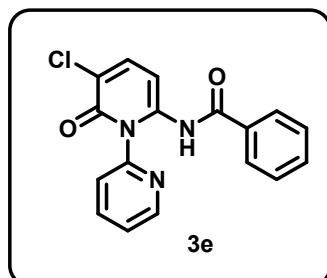

***N*-(3-bromo-2-oxo-2*H*-[1,2'-bipyridin]-6-yl)benzamide (3f)**

Compound **3f** was prepared as described in general procedure for cobalt(III)-catalyzed site-selective C-H amidation of pyridones. White solid, 70.3 mg, 95% yield. Mp: 216-218 °C. **<sup>1</sup>H NMR** (400 MHz, DMSO- $d_6$ )  $\delta$  10.36 (s, 1H), 8.57 – 8.55 (m, 1H), 8.14 (d,  $J = 8.0$  Hz, 1H), 7.94 (td,  $J = 7.6$ , 2.0 Hz, 1H), 7.52 – 7.42 (m, 5H), 7.40 – 7.36 (m, 2H), 6.40 (dd,  $J = 8.0$ , 1.0 Hz, 1H). **<sup>13</sup>C NMR** (126 MHz, DMSO- $d_6$ )  $\delta$  165.8, 158.5, 150.1, 148.9, 142.7, 140.6, 138.4, 132.7, 132.2, 128.4, 127.4, 124.5, 124.3, 113.3, 104.8. **HRMS** (ESI)  $[M-H]^-$  calcd for  $C_{17}H_{11}BrN_3O_2$ : 368.0040, found: 368.0042.

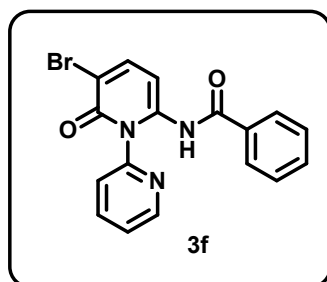

***N*-(2-oxo-3-(trifluoromethyl)-2*H*-[1,2'-bipyridin]-6-yl)benzamide (3g)**

Compound **3g** was prepared as described in general procedure for cobalt(III)-catalyzed site-selective C-H amidation of pyridones. White solid, 65.4 mg, 91% yield. Mp: 218-222 °C. **<sup>1</sup>H NMR** (400 MHz, DMSO- $d_6$ )  $\delta$  10.48 (s, 1H), 8.58 – 8.60 (m, 1H), 8.17 (d,  $J = 8.0$  Hz, 1H), 7.98 (td,  $J = 7.6$ , 2.0 Hz, 1H), 7.55 – 7.46 (m, 5H), 7.42 – 7.38 (m, 2H), 6.64 (d,  $J = 7.6$  Hz, 1H). **<sup>13</sup>C NMR** (126 MHz, DMSO- $d_6$ )  $\delta$  165.7, 158.7, 149.0, 145.4, 141.2 (q,  $J = 4.5$  Hz), 138.4, 132.6, 132.4, 128.4, 127.5, 124.9, 124.7, 123.0 (q,  $J = 271.5$  Hz), 116.1 (q,  $J = 30.4$  Hz), 101.8. **HRMS** (ESI)  $[M-H]^-$

calcd for C<sub>18</sub>H<sub>11</sub>F<sub>3</sub>N<sub>3</sub>O<sub>2</sub>: 358.0809, found: 358.0805.

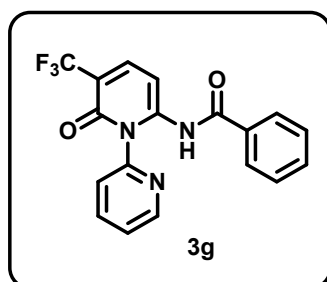

***N*-(4-methyl-2-oxo-2*H*-[1,2'-bipyridin]-6-yl)benzamide (3h)**

Compound **3h** was prepared as described in general procedure for cobalt(III)-catalyzed site-selective C-H amidation of pyridones. White solid, 56.2 mg, 92% yield. Mp: 190-193 °C. **<sup>1</sup>H NMR** (400 MHz, DMSO-*d*<sub>6</sub>) δ 10.24 (s, 1H), 8.54 – 8.53 (m, 1H), 7.89 (td, *J* = 6.4, 1.2 Hz, 1H), 7.51 – 7.45 (m, 3H), 7.40 – 7.34 (m, 4H), 6.32 (d, *J* = 1.2 Hz, 1H), 6.26 (d, *J* = 1.2 Hz, 1H), 2.23 (s, 3H). **<sup>13</sup>C NMR** (126 MHz, DMSO-*d*<sub>6</sub>) δ 165.7, 162.1, 152.0, 150.3, 148.7, 139.5, 137.9, 132.9, 132.0, 128.3, 127.3, 124.6, 123.9, 116.9, 106.5, 21.0. **HRMS** (ESI) [*M*-H]<sup>+</sup> calcd for C<sub>18</sub>H<sub>14</sub>N<sub>3</sub>O<sub>2</sub>: 304.1092, found: 304.1090.

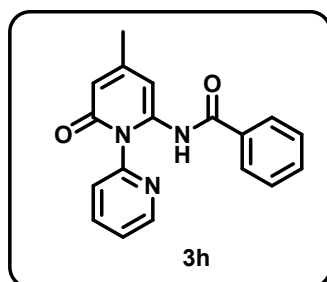

***N*-(4-chloro-2-oxo-2*H*-[1,2'-bipyridin]-6-yl)benzamide (3i)**

Compound **3i** was prepared as described in general procedure for cobalt(III)-catalyzed site-selective C-H amidation of pyridones. White solid, 63.2 mg, 97% yield. Mp: 201-203 °C. **<sup>1</sup>H NMR** (400 MHz, DMSO-*d*<sub>6</sub>) δ 10.38 (s, 1H), 8.56 (m, 1H), 7.93 (m, 1H), 7.46 – 7.37 (m, 7H), 6.69 (s, 1H), 6.62 (s, 1H). **<sup>13</sup>C NMR** (126 MHz, DMSO-*d*<sub>6</sub>) δ 165.7, 161.0, 149.4, 148.9, 146.7, 141.6, 138.3, 132.6, 132.2, 128.4, 127.4, 124.7, 124.4, 116.7, 105.1. **HRMS** (ESI) [*M*-H]<sup>+</sup> calcd for C<sub>17</sub>H<sub>11</sub>ClN<sub>3</sub>O<sub>2</sub>: 324.0545, found: 324.0544.

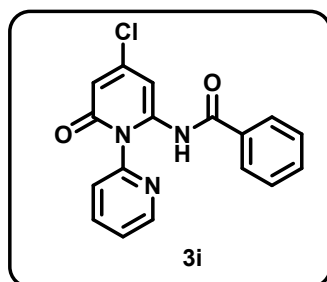

***N*-(2-oxo-4-(trifluoromethyl)-2*H*-[1,2'-bipyridin]-6-yl)benzamide (3j)**

Compound **3j** was prepared as described in general procedure for cobalt(III)-catalyzed site-selective C-H amidation of pyridones. White solid, 69.0 mg, 96% yield. Mp: 172-175 °C. **<sup>1</sup>H NMR** (400 MHz, DMSO-*d*<sub>6</sub>) δ 10.47 (s, 1H), 8.59 – 8.58 (m, 1H), 7.97 (td, *J* = 7.6, 1.6 Hz, 1H), 7.54 – 7.50 (m, 1H), 7.49 – 7.45 (m, 4H), 7.42 – 7.38 (m, 2H), 6.96 (d, *J* = 0.8 Hz, 1H), 6.74 (d, *J* = 2.0 Hz, 1H). **<sup>13</sup>C NMR** (126 MHz, DMSO-*d*<sub>6</sub>) δ 165.8, 161.2, 149.3, 149.0, 143.2, 140.5 (q, *J* = 36.0 Hz), 138.5, 132.6, 132.3, 128.4, 127.4, 124.6, 124.5, 122.3 (q, *J* = 274.4 Hz), 116.1, 98.5. **HRMS** (ESI)

[M-H]<sup>-</sup> calcd for C<sub>18</sub>H<sub>11</sub>F<sub>3</sub>N<sub>3</sub>O<sub>2</sub>: 358.0809, found: 358.0801.

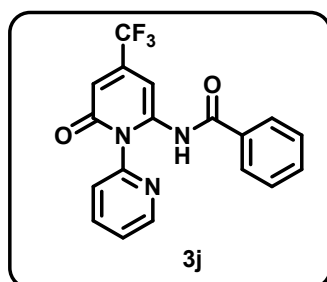

***N*-(5-fluoro-2-oxo-2*H*-[1,2'-bipyridin]-6-yl)benzamide (3l)**

Compound **3l** was prepared as described in general procedure for cobalt(III)-catalyzed site-selective C-H amidation of pyridones. White solid, 53.2 mg, 86% yield. Mp: 195-199 °C. <sup>1</sup>H NMR (500 MHz, DMSO-*d*<sub>6</sub>) δ 10.32 (s, 1H), 8.56 (dd, *J* = 4.8, 1.8 Hz, 1H), 7.98 – 7.79 (m, 2H), 7.57 – 7.48 (m, 3H), 7.47 – 7.30 (m, 4H), 6.61 (dd, *J* = 10.2, 4.8 Hz, 1H). <sup>13</sup>C NMR (126 MHz, DMSO-*d*<sub>6</sub>) δ 166.2, 160.7, 150.0, 149.5, 143.3 (d, *J* = 239.4 Hz), 138.9, 133.3 (d, *J* = 25.2 Hz), 132.8, 132.7, 128.9, 127.9, 127.5 (d, *J* = 23.9 Hz), 124.8, 124.7, 121.1 (d, *J* = 6.3 Hz). HRMS (ESI) [M-H]<sup>-</sup> calcd for C<sub>17</sub>H<sub>11</sub>FN<sub>3</sub>O<sub>2</sub>: 308.0841, found: 308.0837.

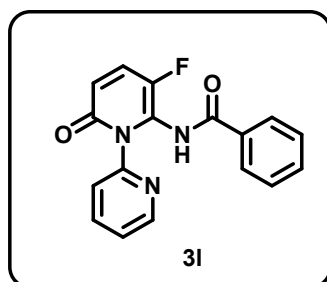

***N*-(4-oxo-4*H*-[1,2'-bipyridin]-2-yl)benzamide (3m)**

Compound **3m** was prepared as described in general procedure for cobalt(III)-catalyzed site-selective C-H amidation of pyridones. White solid, 38.5 mg, 66% yield. Mp: 143-146 °C. <sup>1</sup>H NMR (400 MHz, DMSO-*d*<sub>6</sub>) δ 10.29 (s, 1H), 8.55 – 8.54 (m, 1H), 7.90 (td, *J* = 7.6, 1.6 Hz, 1H), 7.63 – 7.59 (m, 1H), 7.51 – 7.45 (m, 3H), 7.42 – 7.35 (m, 4H), 6.50 (d, *J* = 9.6 Hz, 1H), 6.37 (d, *J* = 8.0 Hz, 1H). <sup>13</sup>C NMR (126 MHz, DMSO-*d*<sub>6</sub>) δ 165.8, 162.4, 150.3, 148.8, 140.8, 140.6, 138.0, 132.8, 132.0, 128.3, 128.2, 127.4, 127.3, 124.5, 124.0, 118.8, 104.2. HRMS (ESI) [M-H]<sup>-</sup> calcd for C<sub>17</sub>H<sub>12</sub>N<sub>3</sub>O<sub>2</sub>: 290.0923, found: 290.0929.

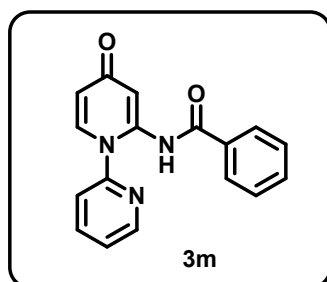

***N*-(1-oxo-2-(pyridin-2-yl)-1,2-dihydroisoquinolin-3-yl)benzamide (3n)**

Compound **3n** was prepared as described in general procedure for cobalt(III)-catalyzed site-selective C-H amidation of pyridones. White solid, 58.7 mg, 86% yield. Mp: 186-189 °C. <sup>1</sup>H NMR (400 MHz, DMSO-*d*<sub>6</sub>) δ 10.33 (s, 1H), 8.58 – 8.57 (m, 1H), 8.25 – 8.23 (m, 1H), 7.92 (td, *J* = 6.4, 1.6 Hz, 1H), 7.81 – 7.77 (m, 2H), 7.60 – 7.57 (m, 1H), 7.51 – 7.48 (m, 3H), 7.45 – 7.37 (m, 4H), 6.81 (s, 1H). <sup>13</sup>C NMR (126 MHz, DMSO-*d*<sub>6</sub>) δ 166.2, 162.1, 150.6, 148.8, 138.0, 136.5, 134.7,

133.3, 133.0, 131.9, 128.3, 127.3, 127.2, 127.1, 126.5, 124.7, 124.6, 123.9, 104.5. **HRMS** (ESI)  $[M-H]^-$  calcd for  $C_{21}H_{14}N_3O_2$ : 340.1092, found: 340.1088.

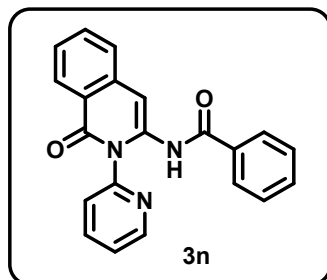

***N*-(6-bromo-1-oxo-2-(pyridin-2-yl)-1,2-dihydroisoquinolin-3-yl)benzamide (3o)**

Compound **3o** was prepared as described in general procedure for cobalt(III)-catalyzed site-selective C-H amidation of pyridones. White solid, 79.0 mg, 94% yield. Mp: °C. **<sup>1</sup>H NMR** (500 MHz, DMSO-*d*<sub>6</sub>) δ 10.40 (s, 1H), 8.58 (dd, *J* = 4.9, 1.7 Hz, 1H), 8.15 (d, *J* = 8.6 Hz, 1H), 8.10 (d, *J* = 1.9 Hz, 1H), 7.93 (td, *J* = 7.7, 1.9 Hz, 1H), 7.74 (dd, *J* = 8.6, 2.0 Hz, 1H), 7.53 – 7.41 (m, 5H), 7.42 – 7.36 (m, 2H), 6.82 (s, 1H). **<sup>13</sup>C NMR** (126 MHz, DMSO-*d*<sub>6</sub>) δ 166.6, 162.1, 150.7, 149.3, 138.7, 138.6, 136.6, 133.3, 132.5, 130.5, 130.1, 129.2, 128.8, 127.9, 127.8, 125.2, 124.5, 123.9, 103.9. **HRMS** (ESI)  $[M+H]^+$  calcd for  $C_{21}H_{15}N_3O_2Br$ : 420.0342, found: 420.0334.

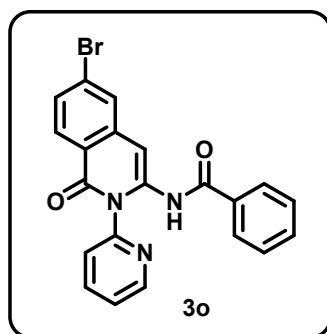

***N*-(7-bromo-1-oxo-2-(pyridin-2-yl)-1,2-dihydroisoquinolin-3-yl)benzamide (3p)**

Compound **3p** was prepared as described in general procedure for cobalt(III)-catalyzed site-selective C-H amidation of pyridones. White solid, 75.8 mg, 90% yield. Mp: 196-198°C. **<sup>1</sup>H NMR** (500 MHz, DMSO-*d*<sub>6</sub>) δ 10.36 (s, 1H), 8.59 (dd, *J* = 5.0, 1.8 Hz, 1H), 8.32 (d, *J* = 2.1 Hz, 1H), 7.99 (dd, *J* = 8.4, 2.2 Hz, 1H), 7.94 (td, *J* = 7.7, 2.0 Hz, 1H), 7.79 (d, *J* = 8.5 Hz, 1H), 7.54 – 7.42 (m, 5H), 7.42 – 7.36 (m, 2H), 6.87 (s, 1H). **<sup>13</sup>C NMR** (126 MHz, DMSO-*d*<sub>6</sub>) δ 166.6, 161.5, 150.7, 149.3, 138.7, 136.7, 136.0, 135.9, 133.4, 132.4, 129.9, 129.4, 128.8, 127.8, 126.5, 125.2, 124.6, 120.3, 104.5. **HRMS** (ESI)  $[M+H]^+$  calcd for  $C_{21}H_{15}N_3O_2Br$ : 420.0342, found: 420.0333.

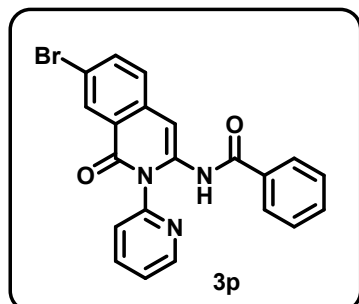

***N*-(6-methoxy-1-oxo-2-(pyridin-2-yl)-1,2-dihydroisoquinolin-3-yl)benzamide (3q)**

Compound **3q** was prepared as described in general procedure for cobalt(III)-catalyzed site-

selective C-H amidation of pyridones. White solid, 73.5 mg, 99% yield. Mp: 237-240°C. **<sup>1</sup>H NMR** (500 MHz, DMSO-*d*<sub>6</sub>) δ 10.31 (s, 1H), 8.57 (dd, *J* = 5.1, 1.8 Hz, 1H), 8.15 (d, *J* = 8.8 Hz, 1H), 7.91 (td, *J* = 7.7, 1.9 Hz, 1H), 7.53 – 7.46 (m, 3H), 7.45 – 7.35 (m, 4H), 7.27 (d, *J* = 2.5 Hz, 1H), 7.16 (dd, *J* = 8.8, 2.5 Hz, 1H), 6.73 (s, 1H), 3.93 (s, 3H). **<sup>13</sup>C NMR** (126 MHz, DMSO-*d*<sub>6</sub>) δ 166.5, 163.5, 162.2, 151.1, 149.2, 139.2, 138.4, 135.7, 133.5, 132.4, 129.9, 128.8, 127.8, 125.3, 124.3, 118.7, 116.7, 108.3, 104.8, 56.1. **HRMS** (ESI) [*M*+H]<sup>+</sup> calcd for C<sub>22</sub>H<sub>18</sub>N<sub>3</sub>O<sub>3</sub>: 372.1343, found: 372.1337.

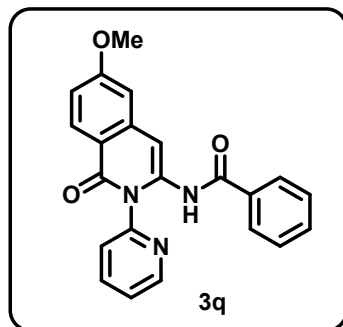

#### 4-Methyl-N-(2-oxo-2H-[1,2'-bipyridin]-6-yl)benzamide (**4a**)

Compound **4a** was prepared as described in general procedure for cobalt(III)-catalyzed site-selective C-H amidation of pyridones. White solid, 40.3 mg, 66% yield. Mp: 172-175 °C. **<sup>1</sup>H NMR** (400 MHz, DMSO-*d*<sub>6</sub>) δ 10.16 (s, 1H), 8.54 – 8.53 (m, 1H), 7.89 (td, *J* = 6.0, 1.6 Hz, 1H), 7.61 – 7.58 (m, 1H), 7.40 – 7.36 (m, 4H), 7.17 (d, *J* = 6.0 Hz, 2H), 6.49 (d, *J* = 7.6 Hz, 1H), 6.36 (d, *J* = 5.6 Hz, 1H), 2.29 (s, 3H). **<sup>13</sup>C NMR** (126 MHz, DMSO-*d*<sub>6</sub>) δ 165.6, 162.3, 150.3, 148.7, 142.2, 140.8, 140.7, 138.0, 130.0, 128.9, 127.4, 124.5, 124.0, 118.6, 104.1, 20.9. **HRMS** (ESI) [*M*-H]<sup>-</sup> calcd for C<sub>18</sub>H<sub>14</sub>N<sub>3</sub>O<sub>2</sub>: 304.1092, found: 304.1085.

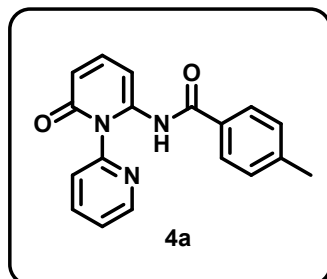

#### 4-Methoxy-N-(2-oxo-2H-[1,2'-bipyridin]-6-yl)benzamide (**4b**)

Compound **4b** was prepared as described in general procedure for cobalt(III)-catalyzed site-selective C-H amidation of pyridones. White solid, 55.9 mg, 87% yield. Mp: 206-209 °C. **<sup>1</sup>H NMR** (500 MHz, Chloroform-*d*) δ 9.30 (s, 1H), 8.70 (dd, *J* = 5.0, 1.8 Hz, 1H), 7.95 (td, *J* = 7.8, 1.9 Hz, 1H), 7.62 (d, *J* = 8.0 Hz, 1H), 7.54 – 7.49 (m, 2H), 7.49 – 7.42 (m, 2H), 7.08 (dd, *J* = 7.5, 1.1 Hz, 1H), 6.91 – 6.85 (m, 2H), 6.48 (dd, *J* = 9.2, 1.1 Hz, 1H), 3.83 (s, 3H). **<sup>13</sup>C NMR** (126 MHz, Chloroform-*d*) δ 163.2, 162.6, 162.1, 150.0, 148.1, 140.6, 139.2, 138.9, 128.4, 125.0, 125.0, 123.9, 115.9, 113.6, 98.2, 55.0. **HRMS** (ESI) [*M*-H]<sup>-</sup> calcd for C<sub>18</sub>H<sub>14</sub>N<sub>3</sub>O<sub>3</sub>: 320.1041, found: 320.1037.



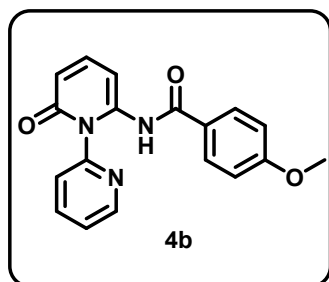

#### 4-Fluoro-N-(2-oxo-2H-[1,2'-bipyridin]-6-yl)benzamide (**4c**)

Compound **4c** was prepared as described in general procedure for cobalt(III)-catalyzed site-selective C-H amidation of pyridones. White solid, 60.0 mg, 97% yield. Mp: 211-213 °C. **<sup>1</sup>H NMR** (400 MHz, DMSO-*d*<sub>6</sub>) δ 10.34 (s, 1H), 8.54 – 8.53 (m, 1H), 7.89 (td, *J* = 6.4, 1.6 Hz, 1H), 7.62 – 7.59 (m, 1H), 7.57 – 7.54 (m, 2H), 7.41 – 7.38 (m, 1H), 7.37 (dd, *J* = 6.4, 0.8 Hz, 1H), 7.22 (t, *J* = 7.2 Hz, 2H), 6.51 (dd, *J* = 7.6, 0.8 Hz, 1H), 6.37 (dd, *J* = 6.0, 0.8 Hz, 1H). **<sup>13</sup>C NMR** (126 MHz, DMSO-*d*<sub>6</sub>) δ 164.7, 164.2 (d, *J* = 249.5 Hz), 162.3, 150.3, 148.8, 140.8, 140.4, 138.0, 130.1 (d, *J* = 8.8 Hz), 129.3 (d, *J* = 2.5 Hz), 124.5, 124.0, 118.9, 115.4 (d, *J* = 21.4 Hz), 104.4. **HRMS** (ESI) [*M*-H]<sup>-</sup> calcd for C<sub>17</sub>H<sub>11</sub>FN<sub>3</sub>O<sub>2</sub>: 308.0841, found: 308.0839.

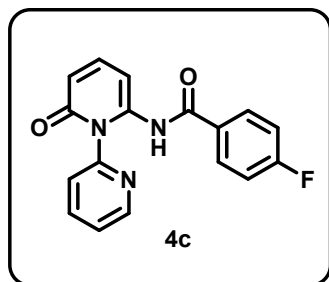

#### 4-Chloro-N-(2-oxo-2H-[1,2'-bipyridin]-6-yl)benzamide (**4d**)

Compound **4d** was prepared as described in general procedure for cobalt(III)-catalyzed site-selective C-H amidation of pyridones. White solid, 61.9 mg, 95% yield. Mp: 192-196 °C. **<sup>1</sup>H NMR** (400 MHz, DMSO-*d*<sub>6</sub>) δ 10.41 (s, 1H), 8.58 – 8.44 (m, 1H), 7.88 (td, *J* = 7.8, 1.9 Hz, 1H), 7.59 (dd, *J* = 9.3, 7.0 Hz, 1H), 7.46 (d, *J* = 1.8 Hz, 4H), 7.42 – 7.32 (m, 2H), 6.50 (dd, *J* = 9.3, 1.1 Hz, 1H), 6.38 – 6.30 (m, 1H). **<sup>13</sup>C NMR** (126 MHz, DMSO-*d*<sub>6</sub>) δ 164.7, 162.3, 150.2, 148.7, 140.8, 140.3, 138.0, 136.9, 131.5, 129.2, 128.5, 124.5, 124.0, 118.9, 104.3. **HRMS** (ESI) [*M*-H]<sup>-</sup> calcd for C<sub>17</sub>H<sub>11</sub>ClN<sub>3</sub>O<sub>2</sub>: 324.0545, found: 324.0542.

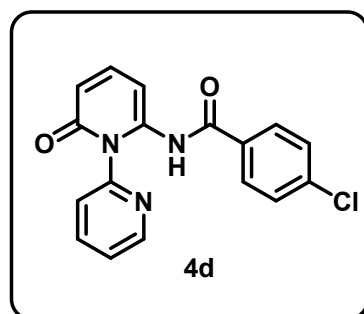

#### 3-Methyl-N-(2-oxo-2H-[1,2'-bipyridin]-6-yl)benzamide (**4e**)

Compound **4e** was prepared as described in general procedure for cobalt(III)-catalyzed site-selective C-H amidation of pyridones. White solid, 56.8 mg, 93% yield. Mp: 138-141 °C. **<sup>1</sup>H NMR** (400 MHz, DMSO-*d*<sub>6</sub>) δ 10.22 (s, 1H), 8.56 (ddd, *J* = 4.8, 1.9, 0.8 Hz, 1H), 7.92 (td, *J* = 7.7, 1.9 Hz, 1H), 7.61 (dd, *J* = 9.3, 7.1 Hz, 1H), 7.46 – 7.35 (m, 2H), 7.34 – 7.28 (m, 1H), 7.28 – 7.21 (m, 3H), 6.50

(dd,  $J = 9.3, 1.1$  Hz, 1H), 6.37 (dt,  $J = 7.1, 0.9$  Hz, 1H), 2.28 (s, 3H).  $^{13}\text{C}$  NMR (126 MHz, DMSO- $d_6$ )  $\delta$  165.8, 162.3, 150.3, 148.7, 140.8, 140.6, 138.0, 137.6, 132.8, 132.6, 128.2, 127.9, 124.5, 124.4, 124.0, 118.6, 104.0, 20.8. HRMS (ESI)  $[\text{M-H}]^-$  calcd for  $\text{C}_{18}\text{H}_{14}\text{N}_3\text{O}_2$ : 304.1092, found: 304.1088.

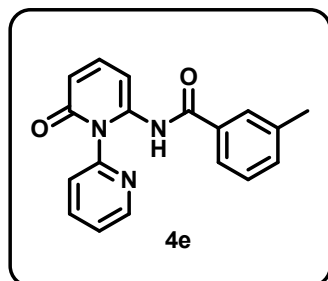

### 3-Methoxy-N-(2-oxo-2H-[1,2'-bipyridin]-6-yl)benzamide (4f)

Compound **4f** was prepared as described in general procedure for cobalt(III)-catalyzed site-selective C-H amidation of pyridones. White solid, 63.0 mg, 98% yield. Mp: 97-99 °C.  $^1\text{H}$  NMR (400 MHz, DMSO- $d_6$ )  $\delta$  10.25 (s, 1H), 8.57 – 8.55 (m, 1H), 7.90 (td,  $J = 8.0, 2.0$  Hz, 1H), 7.63 – 7.59 (m, 1H), 7.44 – 7.40 (m, 1H), 7.37 (d,  $J = 8.0$  Hz, 1H), 7.29 (t,  $J = 8.0$  Hz, 1H), 7.07 – 7.02 (m, 2H), 6.95 – 6.94 (m, 1H), 6.51 (dd,  $J = 9.2, 1.2$  Hz, 1H), 6.37 (dd,  $J = 6.8, 1.2$  Hz, 1H), 3.72 (s, 3H).  $^{13}\text{C}$  NMR (126 MHz, DMSO- $d_6$ )  $\delta$  165.5, 162.3, 158.9, 150.2, 148.8, 140.8, 140.4, 138.1, 134.3, 129.5, 124.5, 124.0, 119.5, 118.8, 117.9, 112.3, 104.2, 55.2. HRMS (ESI)  $[\text{M-H}]^-$  calcd for  $\text{C}_{18}\text{H}_{14}\text{N}_3\text{O}_3$ : 320.1041, found: 320.1037.

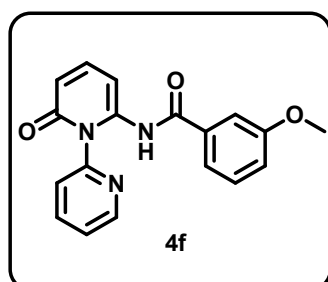

### 3-Chloro-N-(2-oxo-2H-[1,2'-bipyridin]-6-yl)benzamide (4g)

Compound **4g** was prepared as described in general procedure for cobalt(III)-catalyzed site-selective C-H amidation of pyridones. White solid, 63.8 mg, 98% yield. Mp: 179-182 °C.  $^1\text{H}$  NMR (400 MHz, DMSO- $d_6$ )  $\delta$  10.46 (s, 1H), 8.56 (ddd,  $J = 4.8, 1.9, 0.8$  Hz, 1H), 7.92 (td,  $J = 7.7, 1.9$  Hz, 1H), 7.66 – 7.56 (m, 2H), 7.47 – 7.41 (m, 4H), 7.38 (dt,  $J = 7.9, 1.0$  Hz, 1H), 6.53 (dd,  $J = 9.3, 1.1$  Hz, 1H), 6.38 (dd,  $J = 7.0, 1.1$  Hz, 1H).  $^{13}\text{C}$  NMR (126 MHz, DMSO- $d_6$ )  $\delta$  164.5, 162.3, 150.2, 148.8, 140.8, 140.1, 138.1, 134.8, 133.1, 131.9, 130.5, 127.2, 126.1, 124.6, 124.1, 119.1, 104.5. HRMS (ESI)  $[\text{M-H}]^-$  calcd for  $\text{C}_{17}\text{H}_{11}\text{ClN}_3\text{O}_2$ : 324.0545, found: 324.0540.

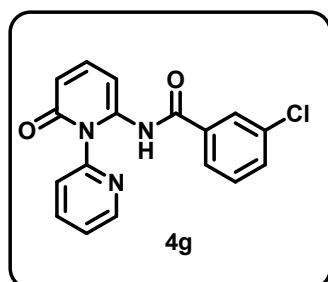

### 3-Bromo-*N*-(2-oxo-2*H*-[1,2'-bipyridin]-6-yl)benzamide (**4h**)

Compound **4h** was prepared as described in general procedure for cobalt(III)-catalyzed site-selective C-H amidation of pyridones. White solid, 73.3 mg, 99% yield. Mp: 191-194 °C. <sup>1</sup>H NMR (400 MHz, DMSO-*d*<sub>6</sub>) δ 10.45 (s, 1H), 8.56 – 8.54 (m, 1H), 7.91 (td, *J* = 8.0, 2.0 Hz, 1H), 7.72 – 7.70 (m, 1H), 7.63 – 7.59 (m, 1H), 7.58 (d, *J* = 1.6 Hz, 1H), 7.49 – 7.46 (m, 1H), 7.44 – 7.40 (m, 1H), 7.38 – 7.34 (m, 2H), 6.52 (dd, *J* = 9.2, 1.2 Hz, 1H), 6.37 (dd, *J* = 7.2, 1.2 Hz, 1H). <sup>13</sup>C NMR (126 MHz, DMSO-*d*<sub>6</sub>) δ 164.4, 162.3, 150.2, 148.8, 140.8, 140.1, 138.1, 135.0, 134.7, 130.7, 130.0, 126.4, 124.5, 124.1, 121.5, 119.0, 104.2. HRMS (ESI) [*M*-H]<sup>-</sup> calcd for C<sub>17</sub>H<sub>11</sub>BrN<sub>3</sub>O<sub>2</sub>: 368.0040, found: 368.0037.

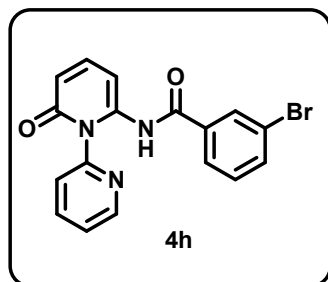

### *N*-(2-oxo-2*H*-[1,2'-bipyridin]-6-yl)-3-(trifluoromethyl)benzamide (**4i**)

Compound **4i** was prepared as described in general procedure for cobalt(III)-catalyzed site-selective C-H amidation of pyridones. White solid, 67.6 mg, 94% yield. Mp: 151-153 °C. <sup>1</sup>H NMR (400 MHz, DMSO-*d*<sub>6</sub>) δ 10.59 (s, 1H), 8.55 – 8.53 (m, 1H), 7.93 – 7.88 (m, 2H), 7.77 (d, *J* = 7.6 Hz, 1H), 7.70 (s, 1H), 7.67 – 7.60 (m, 2H), 7.43 – 7.40 (m, 1H), 7.39 – 7.37 (m, 1H), 6.53 (dd, *J* = 9.6, 1.2 Hz, 1H), 6.40 (dd, *J* = 6.8, 1.2 Hz, 1H). <sup>13</sup>C NMR (126 MHz, DMSO-*d*<sub>6</sub>) δ 164.5, 162.3, 150.2, 148.7, 140.8, 140.0, 138.1, 133.8, 131.4, 129.8, 129.0 (q, *J* = 31.9 Hz), 128.6 (q, *J* = 3.4 Hz), 124.5, 124.0, 123.9 (q, *J* = 4.0 Hz), 123.7 (q, *J* = 272.9 Hz), 119.1, 104.4. HRMS (ESI) [*M*-H]<sup>-</sup> calcd for C<sub>18</sub>H<sub>11</sub>F<sub>3</sub>N<sub>3</sub>O<sub>2</sub>: 358.0809, found: 358.0807.

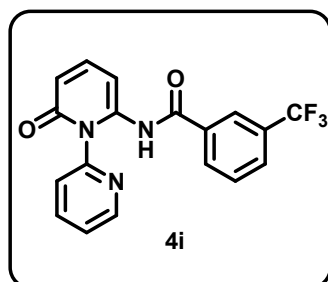

### 3-Nitro-*N*-(2-oxo-2*H*-[1,2'-bipyridin]-6-yl)benzamide (**4j**)

Compound **4j** was prepared as described in general procedure for cobalt(III)-catalyzed site-selective C-H amidation of pyridones. White solid, 27.6 mg, 41% yield. Mp: 216-220 °C. <sup>1</sup>H NMR (400 MHz, DMSO-*d*<sub>6</sub>) δ 10.73 (s, 1H), 8.56 – 8.54 (m, 1H), 8.37 – 8.34 (m, 1H), 8.25 (t, *J* = 2.0 Hz, 1H), 7.94 – 7.89 (m, 2H), 7.71 (t, *J* = 8.0 Hz, 1H), 7.65 – 7.61 (m, 1H), 7.43 – 7.38 (m, 2H), 6.54 (dd, *J* = 5.2, 1.2 Hz, 1H), 6.41 (dd, *J* = 7.2, 1.2 Hz, 1H). <sup>13</sup>C NMR (126 MHz, DMSO-*d*<sub>6</sub>) δ 163.9, 162.2, 150.1, 148.8, 147.5, 140.8, 139.9, 138.1, 134.2, 133.7, 130.3, 126.6, 124.5, 124.1, 122.1, 119.2, 104.4. HRMS (ESI) [*M*-H]<sup>-</sup> calcd for C<sub>17</sub>H<sub>11</sub>N<sub>4</sub>O<sub>4</sub>: 335.0786, found: 335.0781.

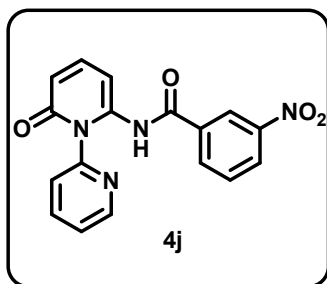

**2-Fluoro-N-(2-oxo-2H-[1,2'-bipyridin]-6-yl)benzamide (4k)**

Compound **4k** was prepared as described in general procedure for cobalt(III)-catalyzed site-selective C-H amidation of pyridones. White solid, 27.6 mg, 41% yield. Mp: 216-220 °C. <sup>1</sup>H NMR (400 MHz, DMSO-*d*<sub>6</sub>) δ 10.03 (s, 1H), 8.62 – 8.61 (m, 1H), 7.98 (td, *J* = 6.4, 1.6 Hz, 1H), 7.62 – 7.59 (m, 1H), 7.52 – 7.50 (m, 2H), 7.43 (dd, *J* = 6.0, 1.2 Hz, 1H), 7.28 – 7.25 (m, 1H), 7.22 – 7.17 (m, 1H), 6.51 – 6.47 (m, 2H). <sup>13</sup>C NMR (126 MHz, DMSO-*d*<sub>6</sub>) δ 162.5, 162.1, 158.9 (d, *J* = 251.2 Hz), 150.0, 149.1, 140.9, 139.8, 138.4, 133.4 (d, *J* = 8.7 Hz), 129.9 (d, *J* = 1.1 Hz), 124.6, 124.5 (d, *J* = 3.5 Hz), 124.3, 122.2 (d, *J* = 13.7 Hz), 118.3, 116.2 (d, *J* = 22.1 Hz), 103.0. HRMS (ESI) [M-H]<sup>-</sup> calcd for C<sub>17</sub>H<sub>11</sub>FN<sub>3</sub>O<sub>2</sub>: 308.0841, found: 308.0837.

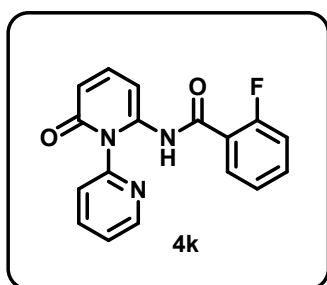

**N-(2-oxo-2H-[1,2'-bipyridin]-6-yl)thiophene-2-carboxamide (4l)**

Compound **4l** was prepared as described in general procedure for cobalt(III)-catalyzed site-selective C-H amidation of pyridones. White solid, 57.1 mg, 96% yield. Mp: 159-162 °C. <sup>1</sup>H NMR (400 MHz, DMSO-*d*<sub>6</sub>) δ 10.27 (s, 1H), 8.54 – 8.52 (m, 1H), 7.90 (td, *J* = 6.0, 1.6 Hz, 1H), 7.76 – 7.75 (m, 1H), 7.62 – 7.58 (m, 1H), 7.49 (dd, *J* = 3.2, 1.2 Hz, 1H), 7.41 – 7.36 (m, 2H), 7.07 – 7.05 (m, 1H), 6.51 (dd, *J* = 7.6, 1.2 Hz, 1H), 6.38 (dd, *J* = 5.6, 1.2 Hz, 1H). <sup>13</sup>C NMR (126 MHz, DMSO-*d*<sub>6</sub>) δ 162.3, 160.1, 150.2, 148.8, 140.8, 139.9, 138.1, 137.4, 132.4, 129.7, 128.0, 124.4, 124.0, 118.9, 104.4. HRMS (ESI) [M-H]<sup>-</sup> calcd for C<sub>15</sub>H<sub>10</sub>SN<sub>3</sub>O<sub>2</sub>: 296.0499, found: 296.0497.

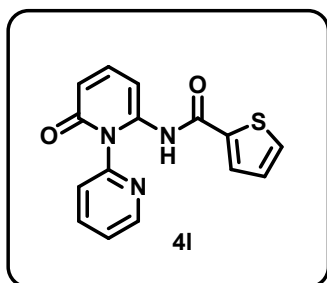

**N-(2-oxo-2H-[1,2'-bipyridin]-6-yl)acetamide (4m)**

Compound **4m** was prepared as described in general procedure for cobalt(III)-catalyzed site-selective C-H amidation of pyridones. White solid, 43.1 mg, 94% yield. Mp: 196-198 °C. <sup>1</sup>H NMR

(400 MHz, DMSO- $d_6$ )  $\delta$  9.54 (s, 1H), 8.60 – 8.58 (m, 1H), 7.97 (td,  $J$  = 8.0, 2.0 Hz, 1H), 7.56 – 7.52 (m, 1H), 7.51 – 7.48 (m, 1H), 7.34 – 7.31 (m, 1H), 6.40 (dd,  $J$  = 9.2, 1.2 Hz, 1H), 6.30 (dd,  $J$  = 7.2, 1.2 Hz, 1H).  $^{13}\text{C}$  NMR (126 MHz, DMSO- $d_6$ )  $\delta$  168.7, 162.2, 150.0, 149.0, 140.8, 140.4, 138.2, 124.4, 124.1, 117.8, 103.1, 22.3. HRMS (ESI)  $[\text{M-H}]^-$  calcd for  $\text{C}_{12}\text{H}_{10}\text{N}_3\text{O}_2$ : 228.0779, found: 228.0774.

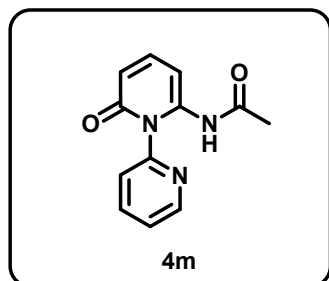

### 3. Mechanistic Investigations

#### H/D exchange experiments

The dry sealed tube was charged with **1a** (0.2 mmol), Cp\*Co(CO)I<sub>2</sub> (10 mol%), AgSbF<sub>6</sub> (20 mol%), KOAc (30 mol%) and CD<sub>3</sub>OD (2 mol) were dissolved in DCM (2 mL). The resulting mixture was stirred at 90 °C for 12 h. Then the solvent was removed under vacuum and <sup>1</sup>H NMR indicated that the C6-H was not deuterated.

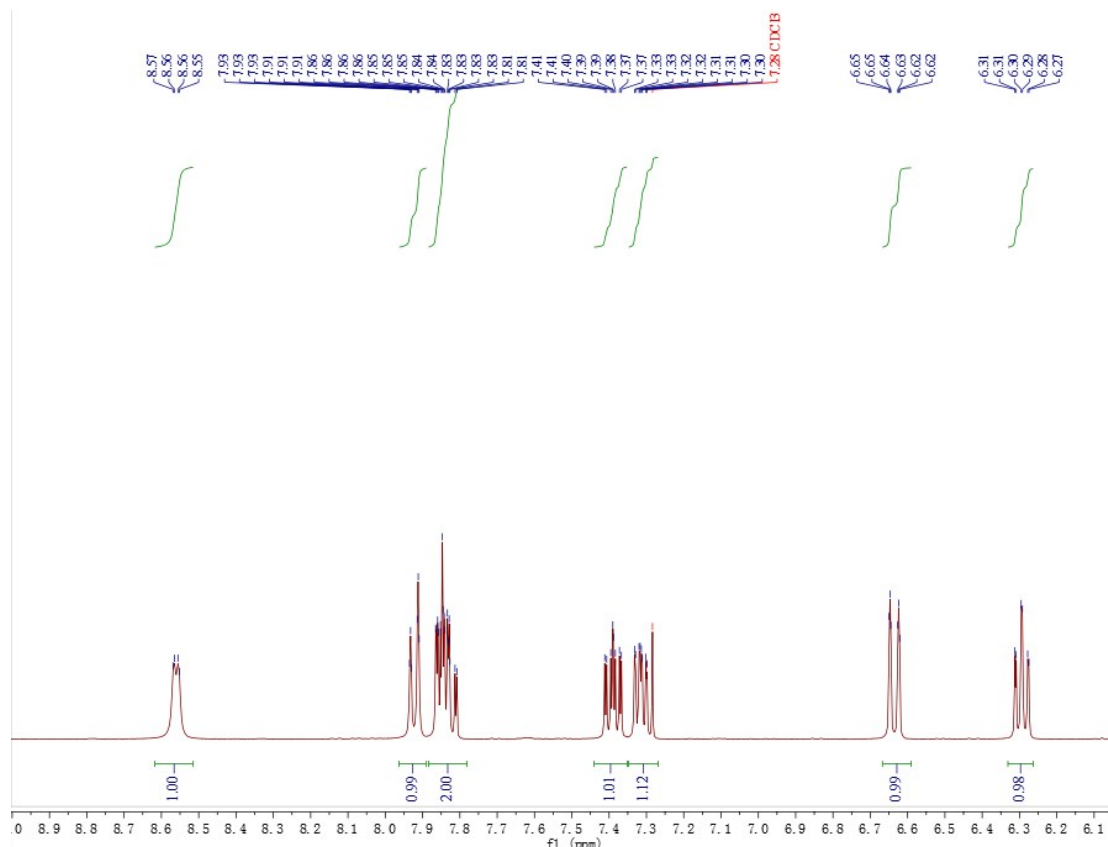

Scheme S1 H/D exchange experiment

#### KIE experiments

A mixture of 2*H*-[1,2'-bipyridin]-2-one **1a** (0.20 mmol) or deuterium-labeled compound [D<sub>1</sub>]-**1a** (0.20 mmol), phenyl oxazolone **2a** (0.6 mmol), Cp\*Co(CO)I<sub>2</sub> (10 mol%), AgSbF<sub>6</sub> (20 mol%), KOAc (30 mol%) and DCM (2 mL) were added into a dry sealed tube. The reactions were stirred at 90 °C in parallel for 20 min. After cooling to room temperature, these two reactions were combined and the solvent was removed under vacuum. The residue was purified by flash chromatography using 2% methanol in DCM as eluent. 40% starting material was recovered and the KIE value was determined to be 0.97.

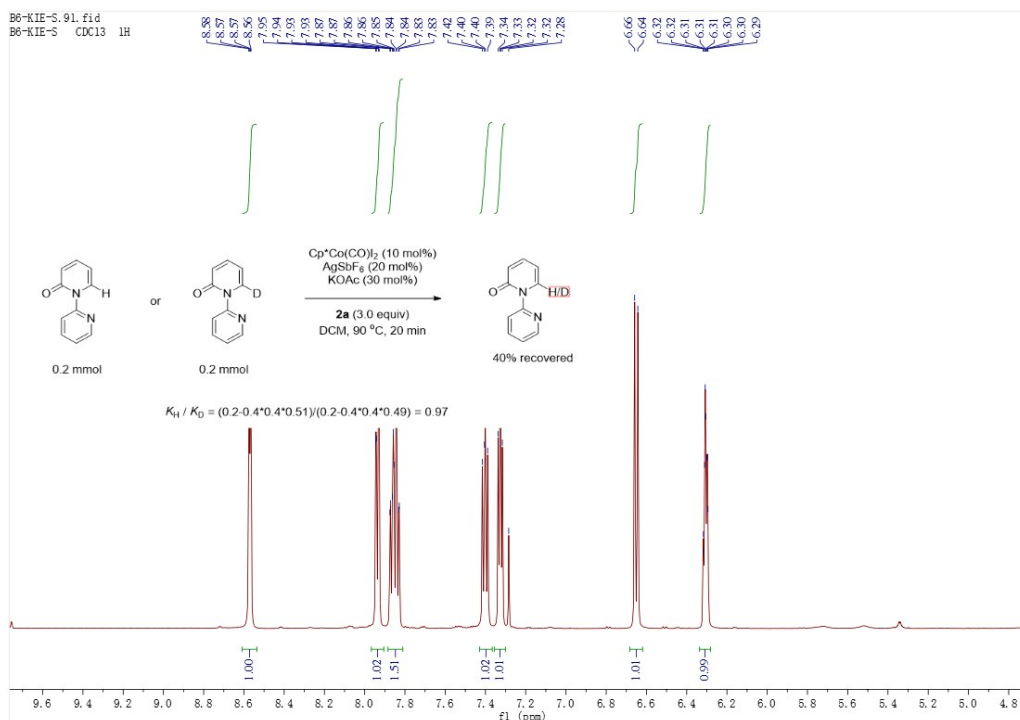

A mixture of 2*H*-[1,2'-bipyridin]-2-one **1a** (0.10 mmol) and deuterium-labeled compound [D<sub>1</sub>]-**1a** (0.10 mmol), phenyl oxazolone **2a** (0.6 mmol), Cp\*Co(CO)I<sub>2</sub> (10 mol%), AgSbF<sub>6</sub> (20 mol%), KOAc (30 mol%) and DCM (2 mL) were added into a dry sealed tube. The solution was stirred at 90 °C for 10 min. Then the solvent was removed under vacuum and the residue was purified by flash chromatography using 2% methanol in DCM as eluent. 69% starting material was recovered and the KIE value was determined to be 0.70.

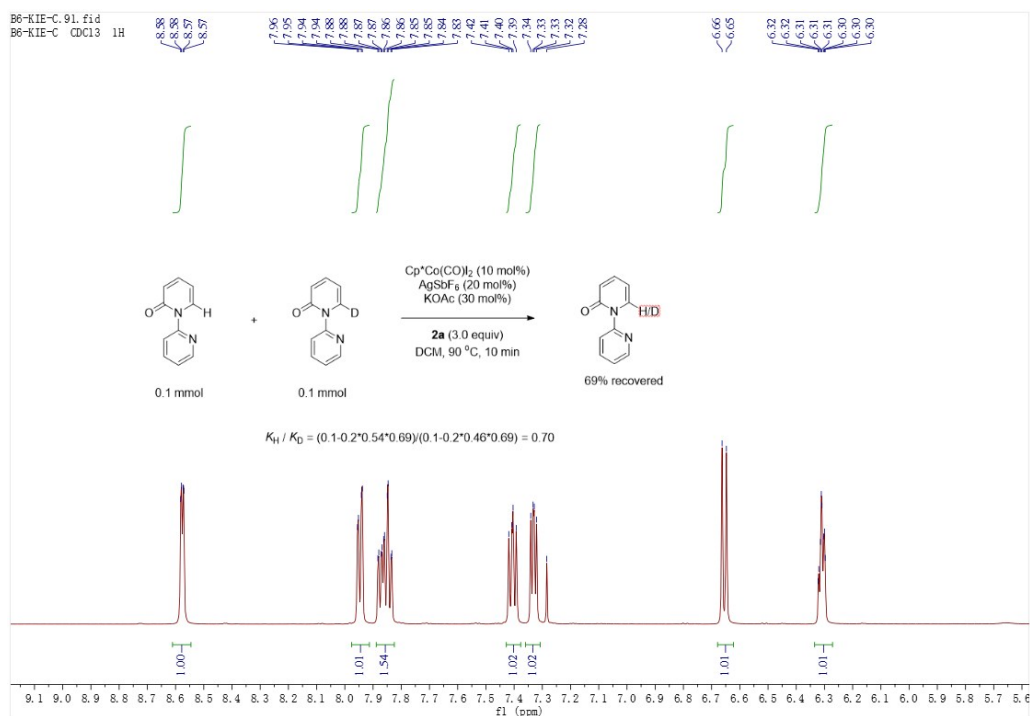

## Competition experiments

A Schlenk tube equipped with a magnetic stir bar was charged with pyridones **1b** (0.1 mmol) and **1g** (0.1 mmol), phenyl oxazolone **2a** (0.3 mmol), Cp\*Co(CO)I<sub>2</sub> (10 mol%), AgSbF<sub>6</sub> (20 mol%) and KOAc (30 mol%) and then capped with septa. 2 mL of DCM was charged to the vial via syringe, and then the resulting mixture was stirred in a pre-heated oil bath at 90 °C for 1 h. After the reaction was completed, the solvent was removed under vacuum and the residue was purified by silica gel column using 2% methanol in DCM as eluent to afford desired amidated product **3b** in 75% yield and trace amount of **3g** was detected by LC-MS.

#### 4. References

(1) a) R. Odani, K. Hirano, T. Satoh and M. Miura, *Angew. Chem. Int. Ed.*, 2014, **53**, 10784; b) V. Smout, A. Peschiulli, S. Verbeeck, E. A. Mitchell, W. Herrebout, P. Bultinck, C. M. Vande Velde, D. Berthelot, L. Meerpoel, B. U. Maes, *J. Org. Chem.*, 2013, **78**, 9803; c) P. Peng, J. Wang, C. Li, W. Zhu, H. Jiang, H. Liu, *Rsc Advances*, 2016, **6**, 57441.



## 5. NMR spectra

*N*-(2-oxo-2*H*-[1,2'-bipyridin]-6-yl)benzamide (3a)

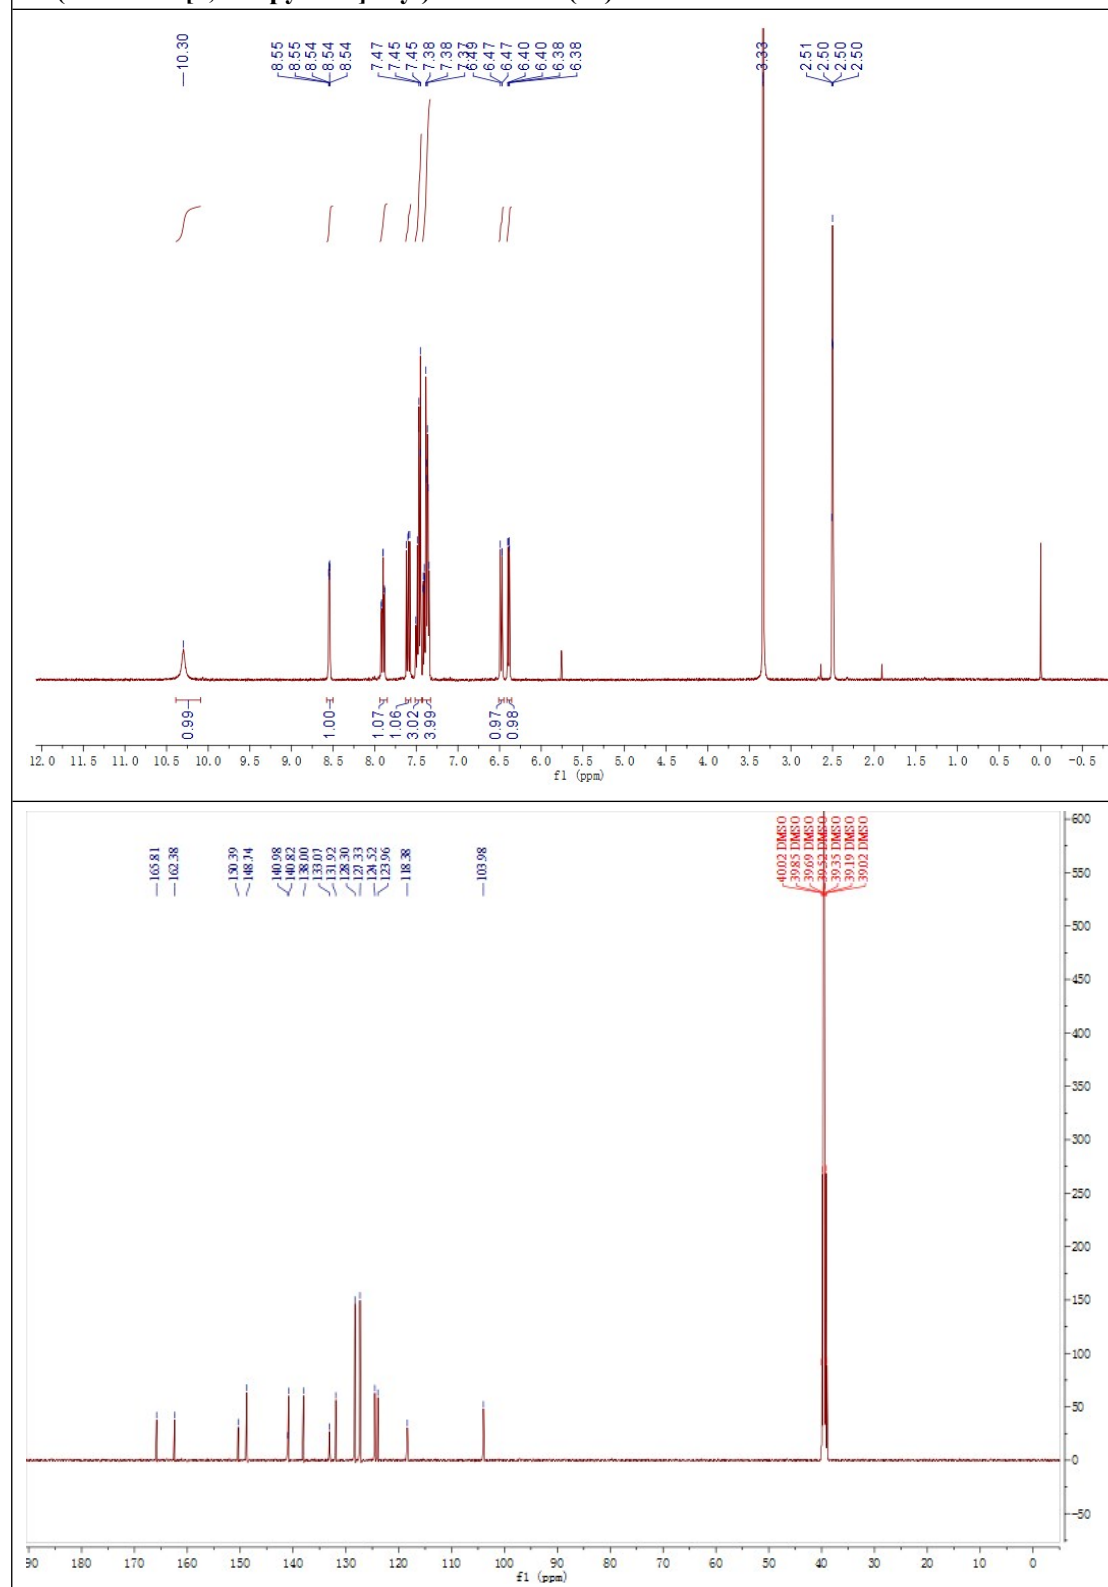

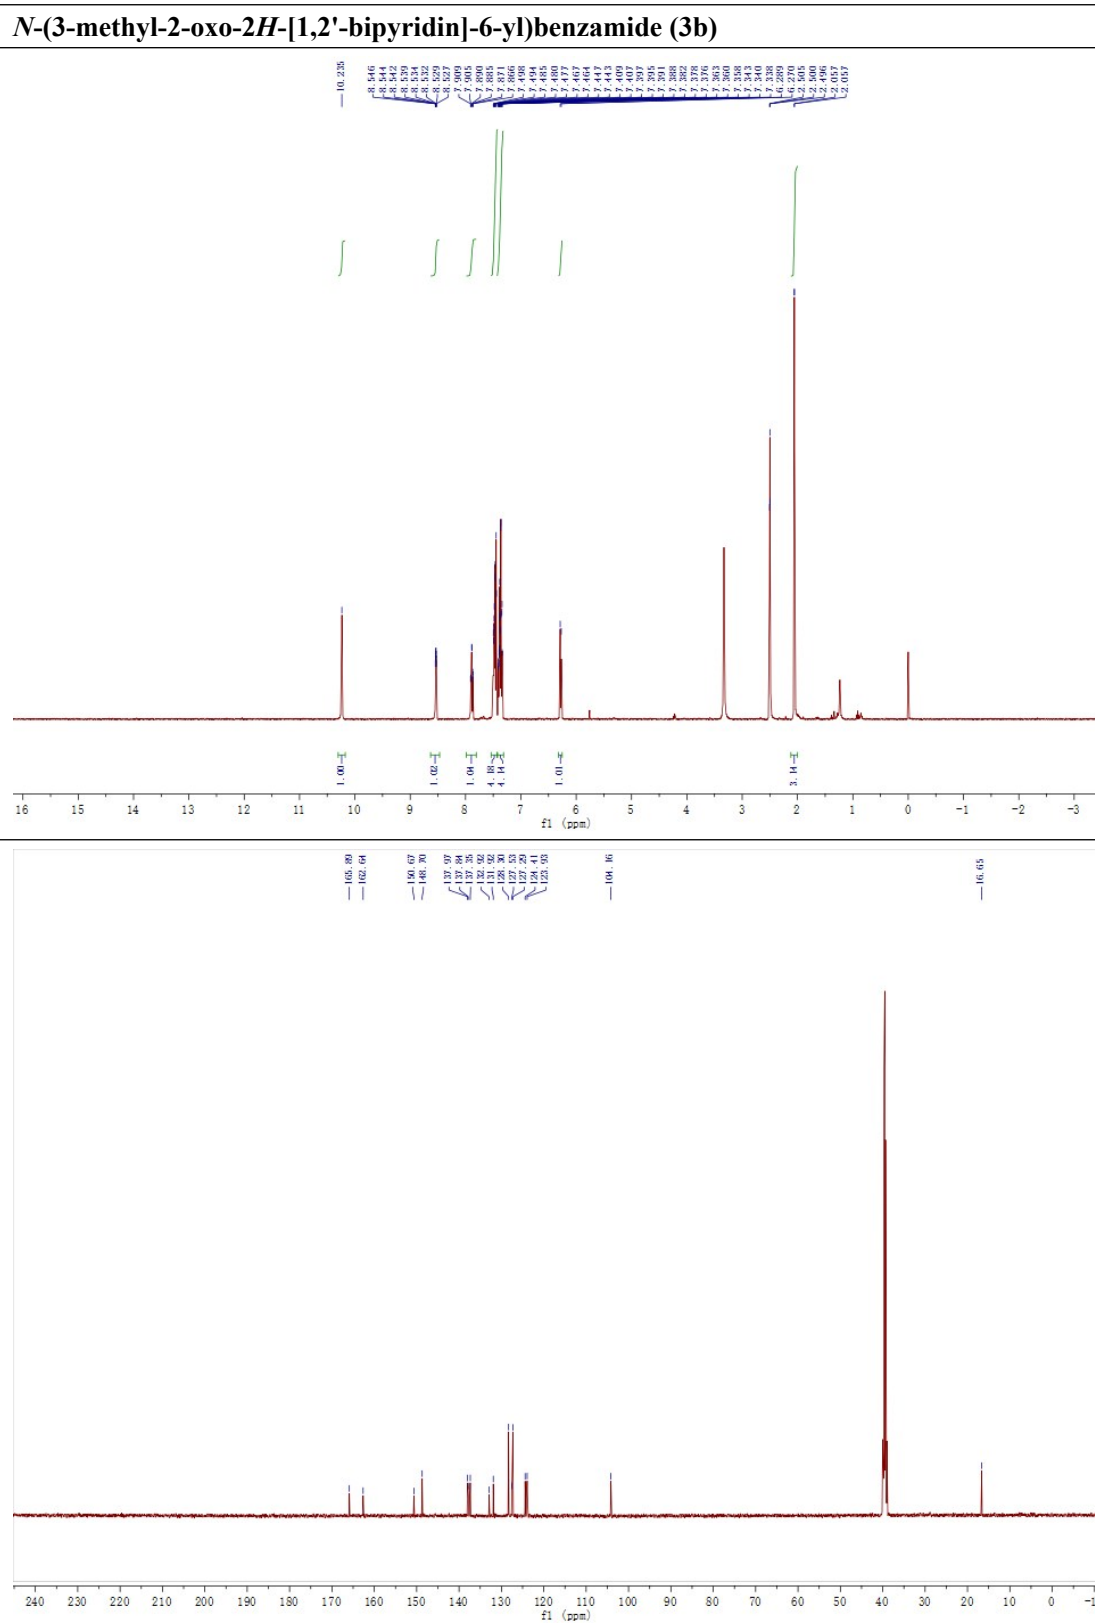

*N*-(3-methoxy-2-oxo-2*H*-[1,2'-bipyridin]-6-yl)benzamide (3c)

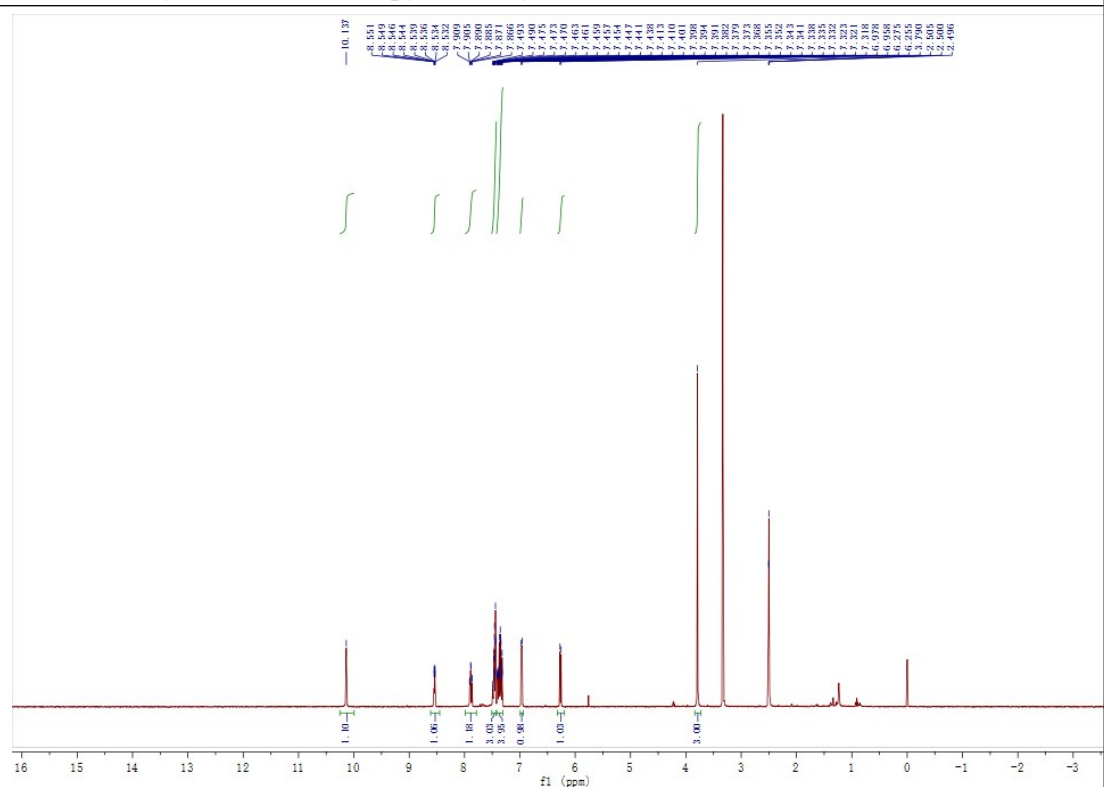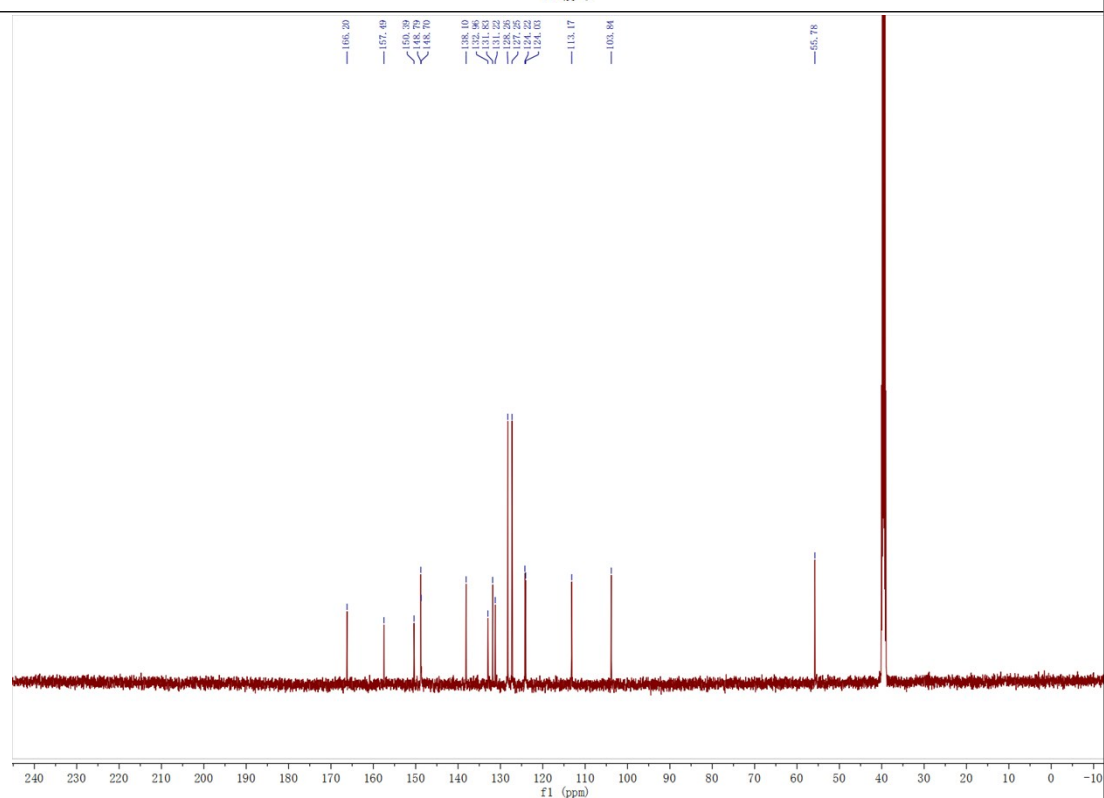

*N*-(3-fluoro-2-oxo-2*H*-[1,2'-bipyridin]-6-yl)benzamide (3d)

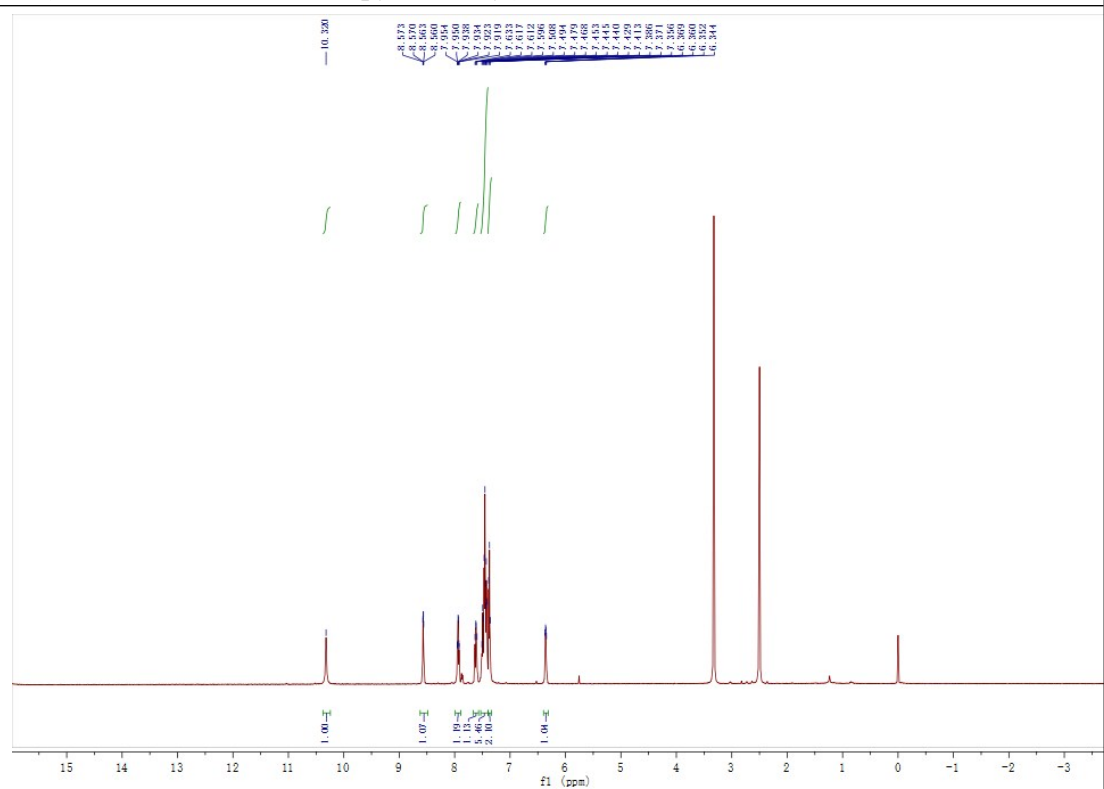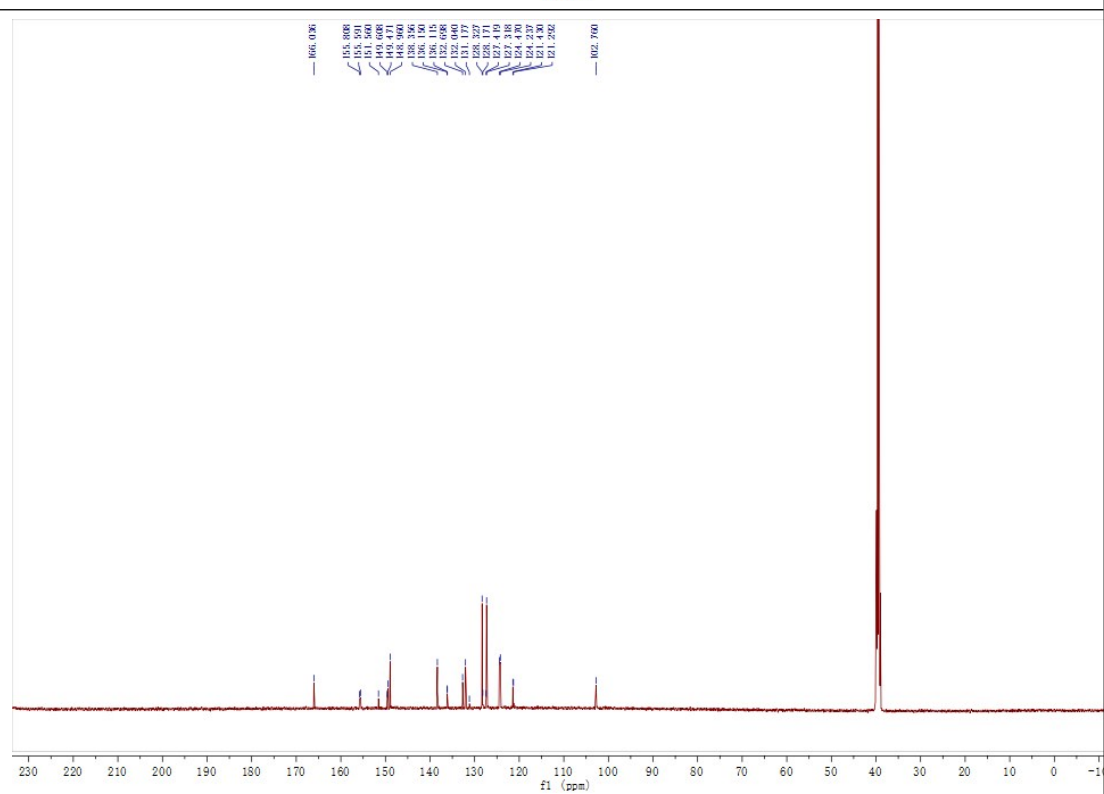

*N*-(3-chloro-2-oxo-2*H*-[1,2'-bipyridin]-6-yl)benzamide (3e)

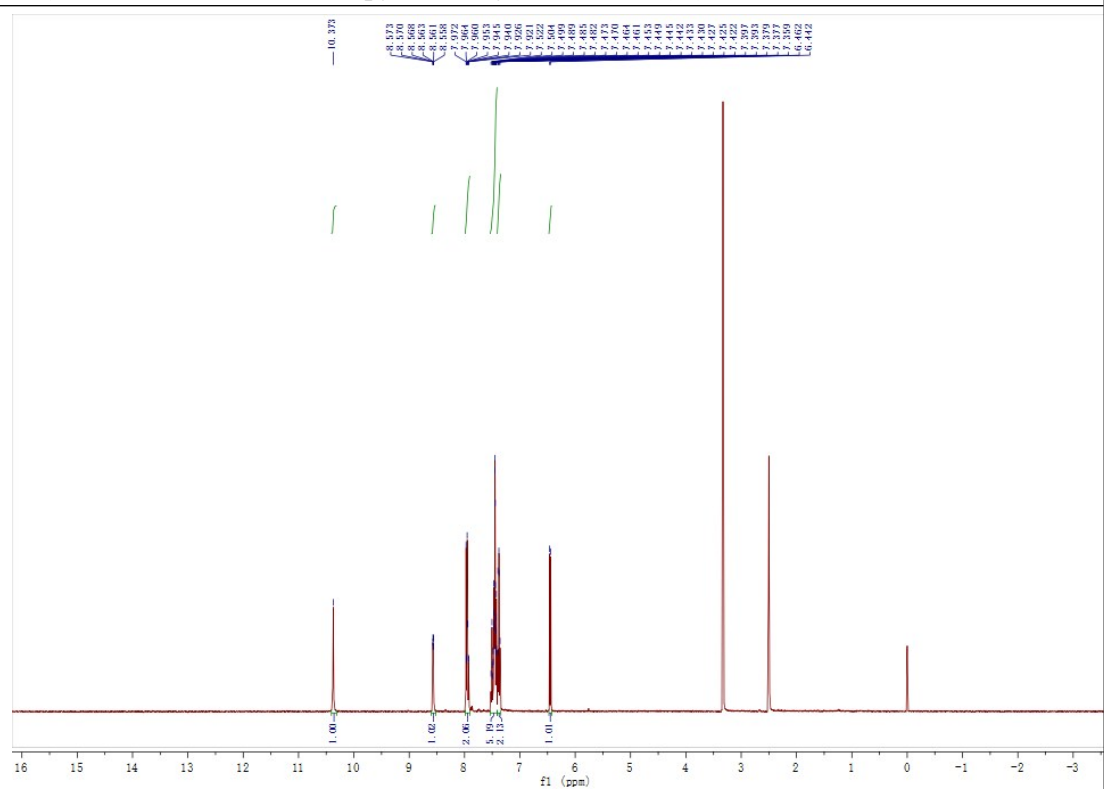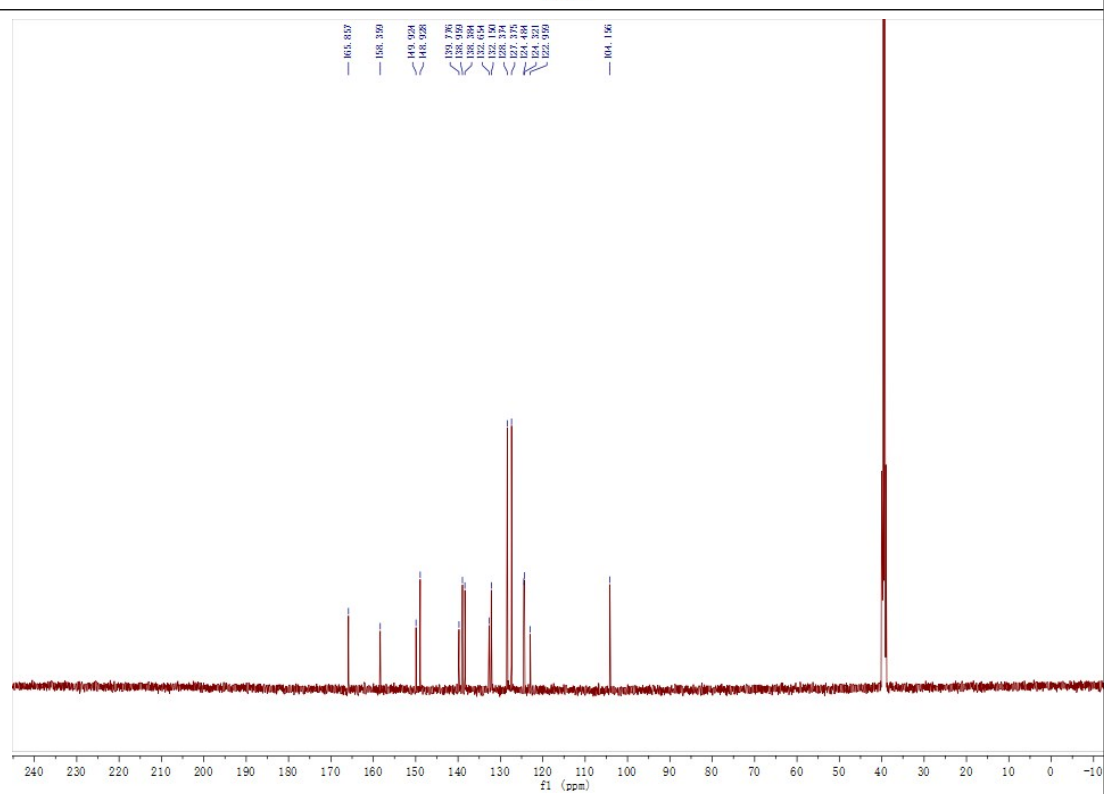

*N*-(3-bromo-2-oxo-2*H*-[1,2'-bipyridin]-6-yl)benzamide (3f)

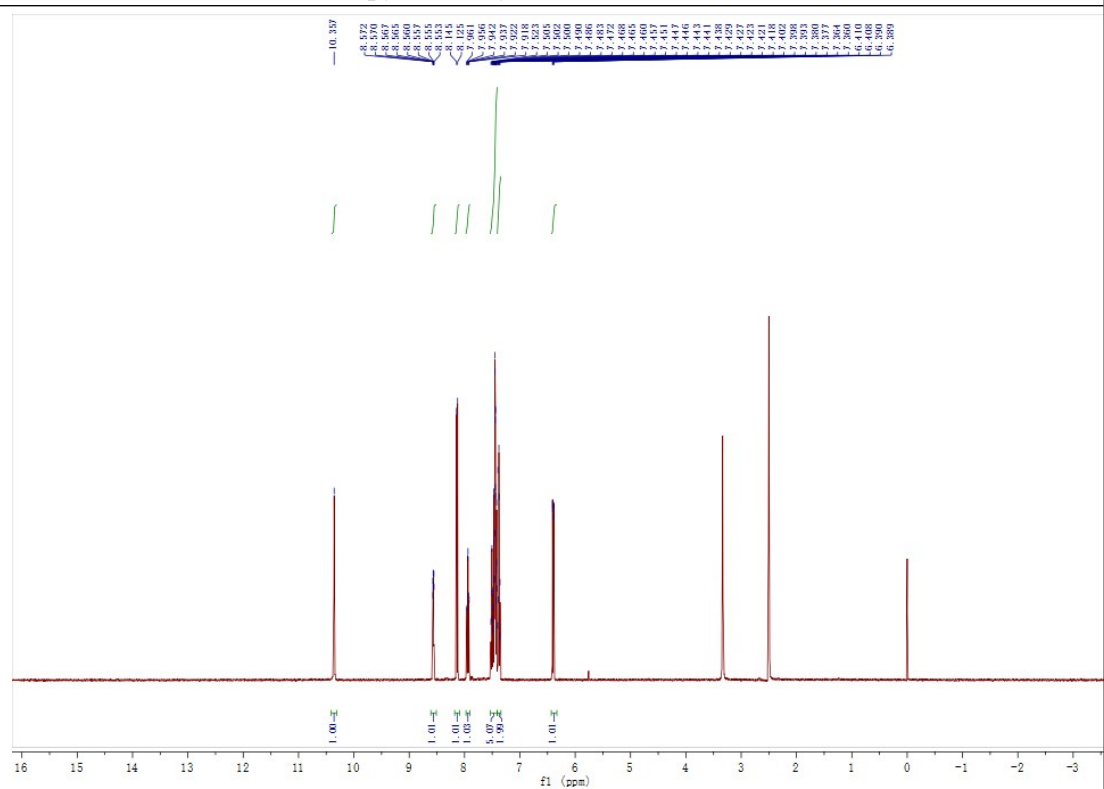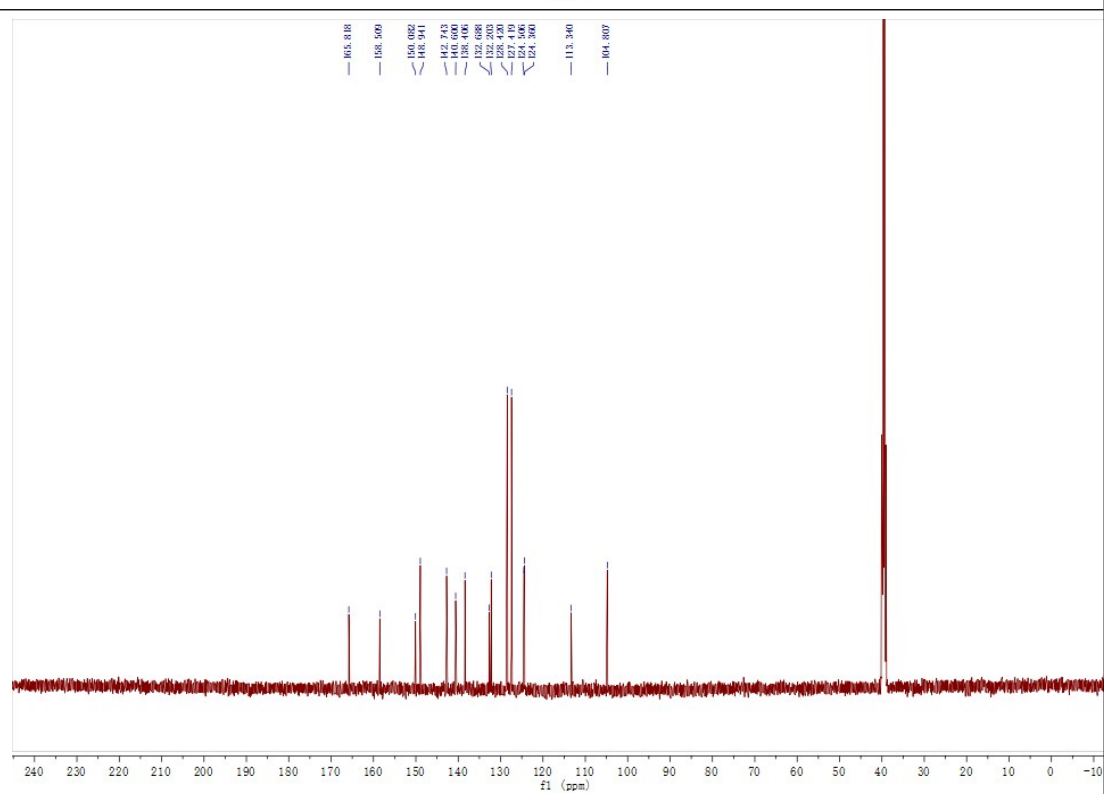

***N*-(2-oxo-3-(trifluoromethyl)-2*H*-[1,2'-bipyridin]-6-yl)benzamide (3g)**

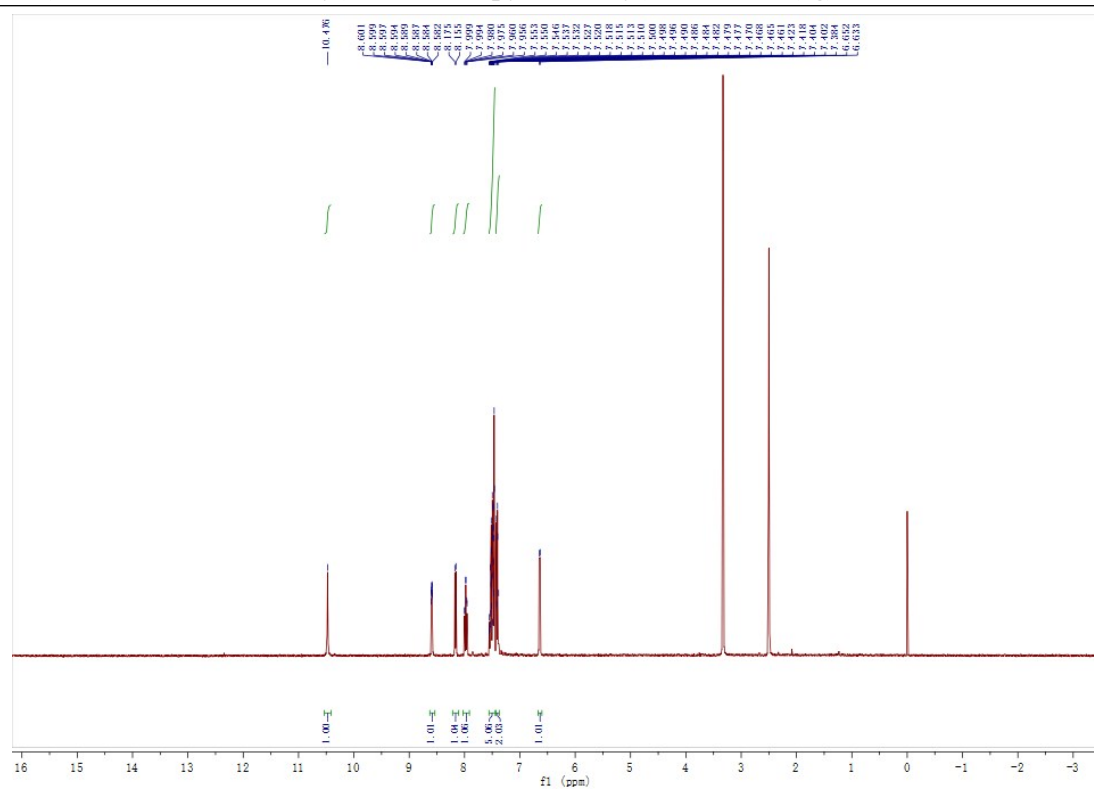

***N*-(4-methyl-2-oxo-2*H*-[1,2'-bipyridin]-6-yl)benzamide (3h)**

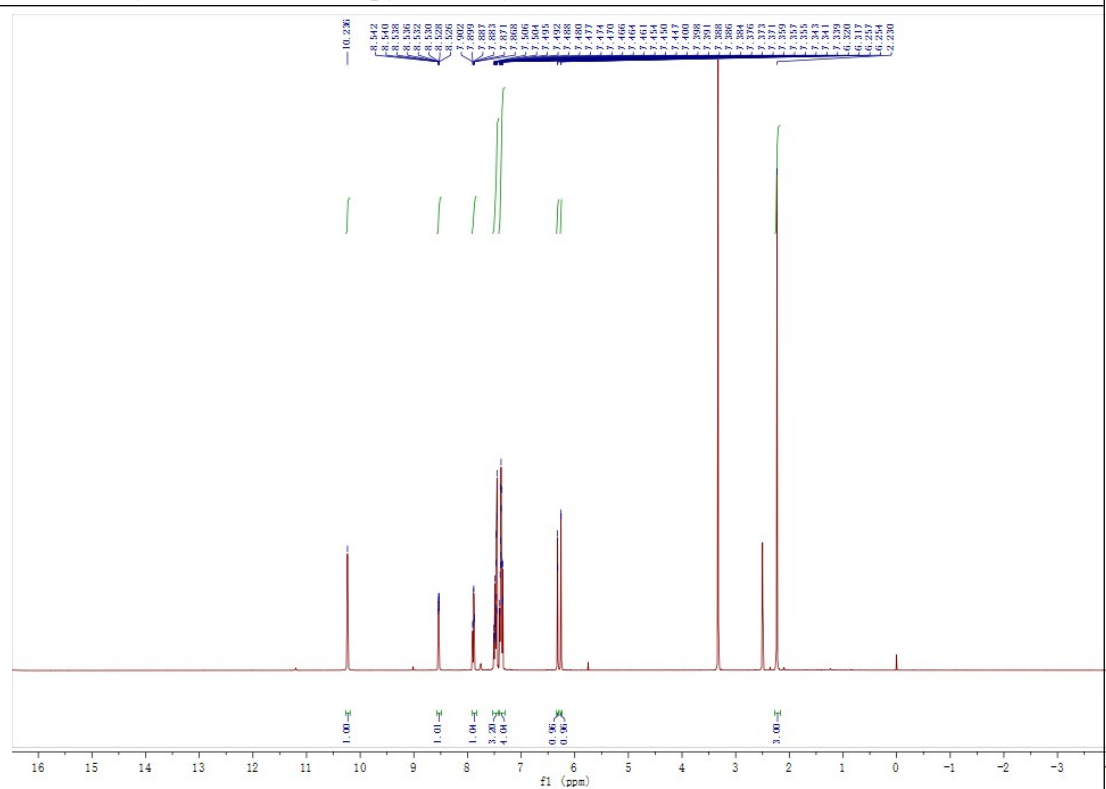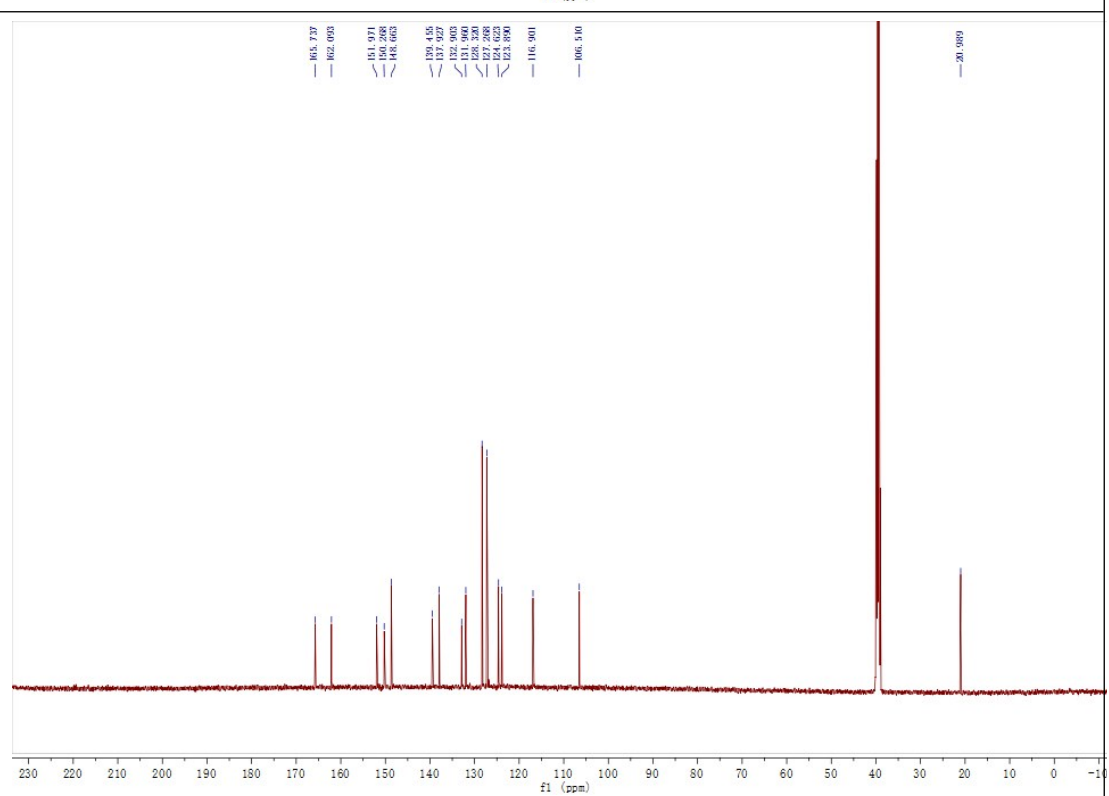



***N*-(4-chloro-2-oxo-2*H*-[1,2'-bipyridin]-6-yl)benzamide (3i)**

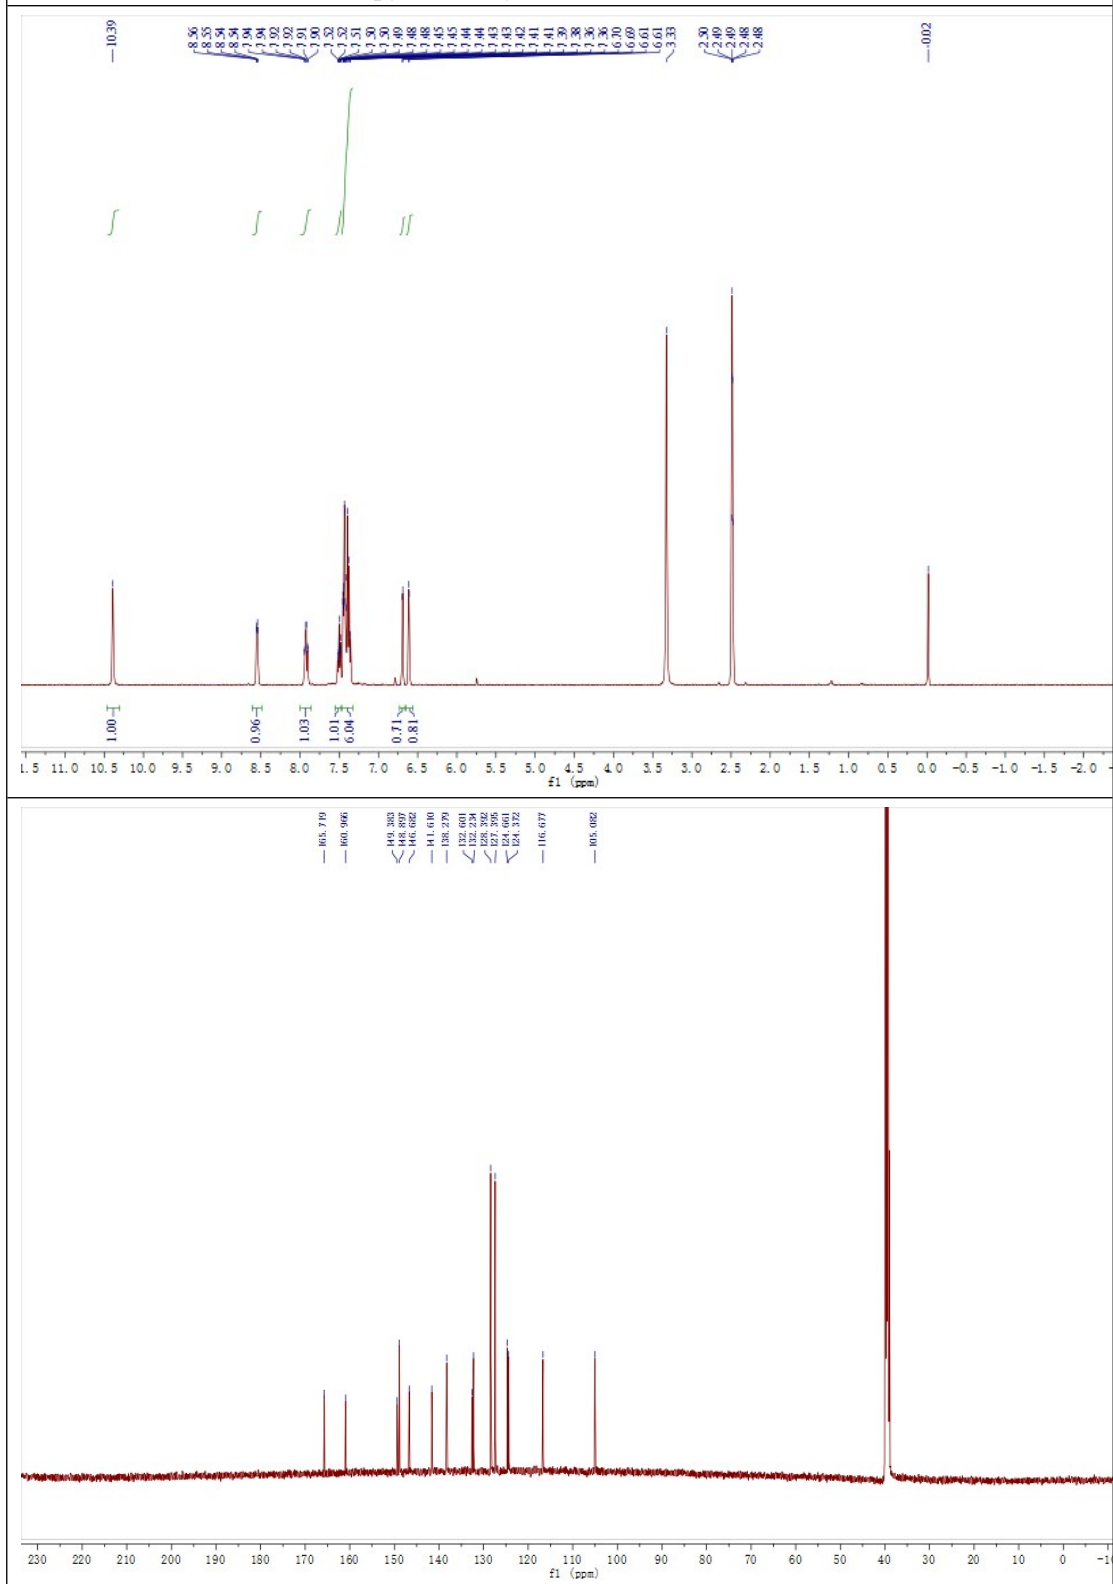

***N*-(2-oxo-4-(trifluoromethyl)-2*H*-[1,2'-bipyridin]-6-yl)benzamide (3j)**

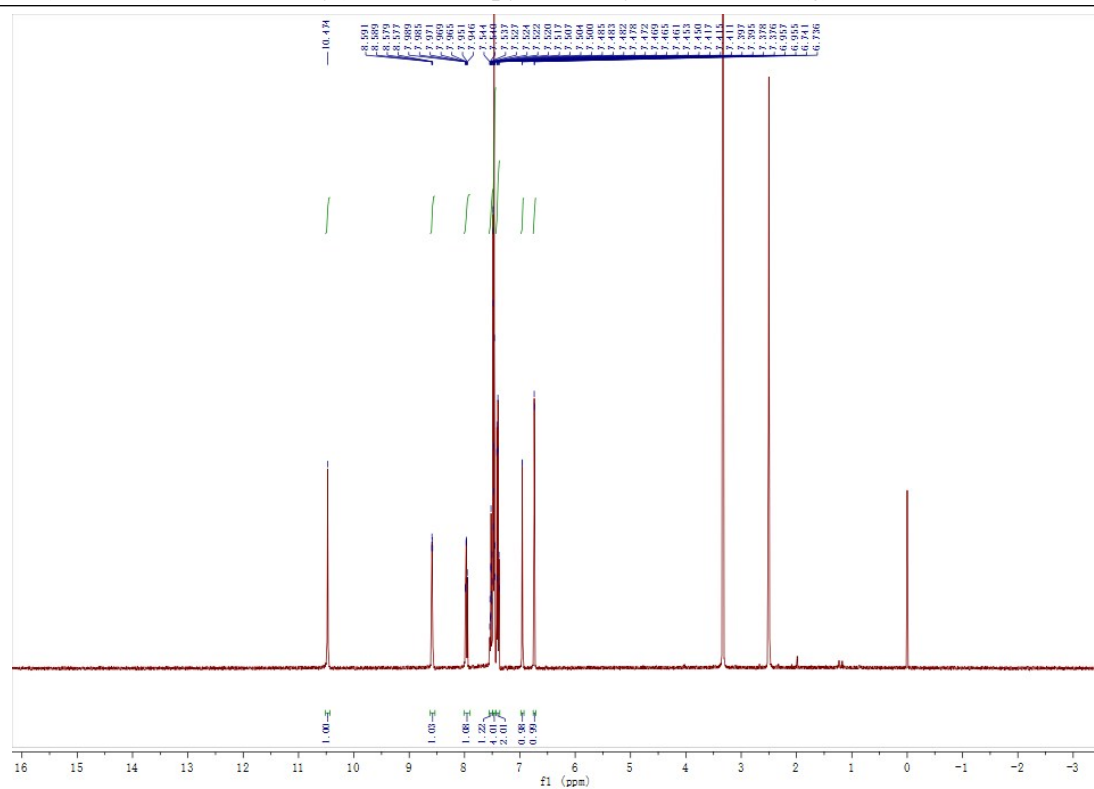

***N*-(5-fluoro-2-oxo-2*H*-[1,2'-bipyridin]-6-yl)benzamide (3l)**

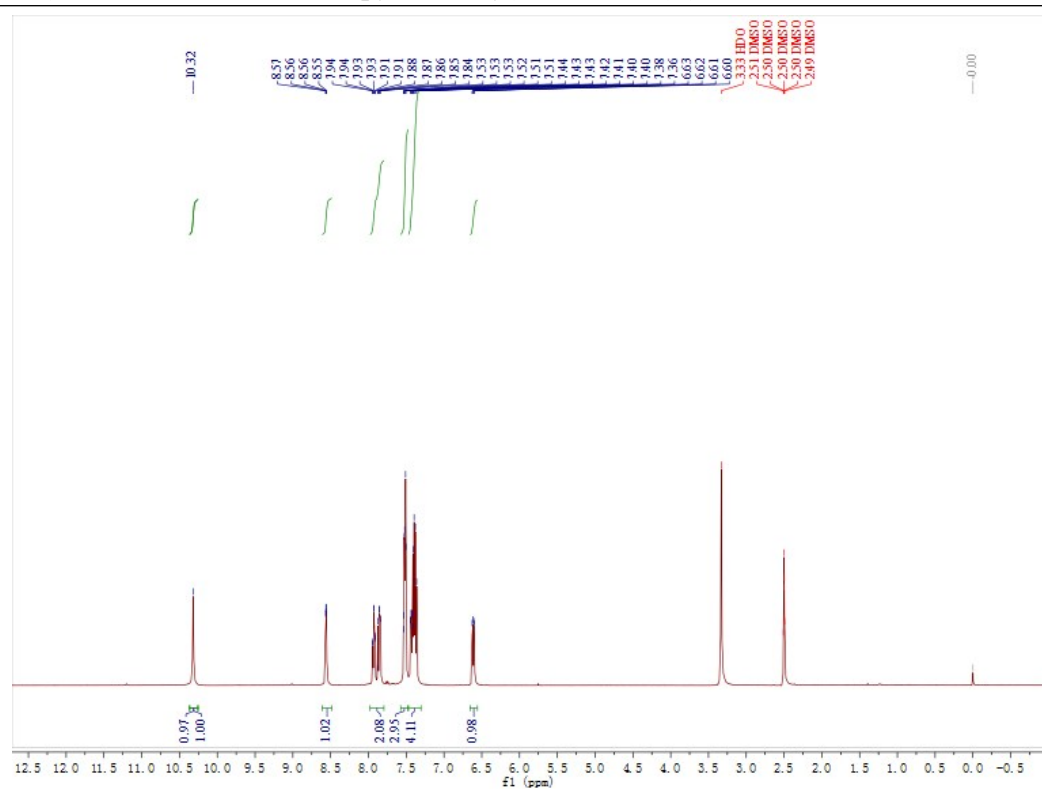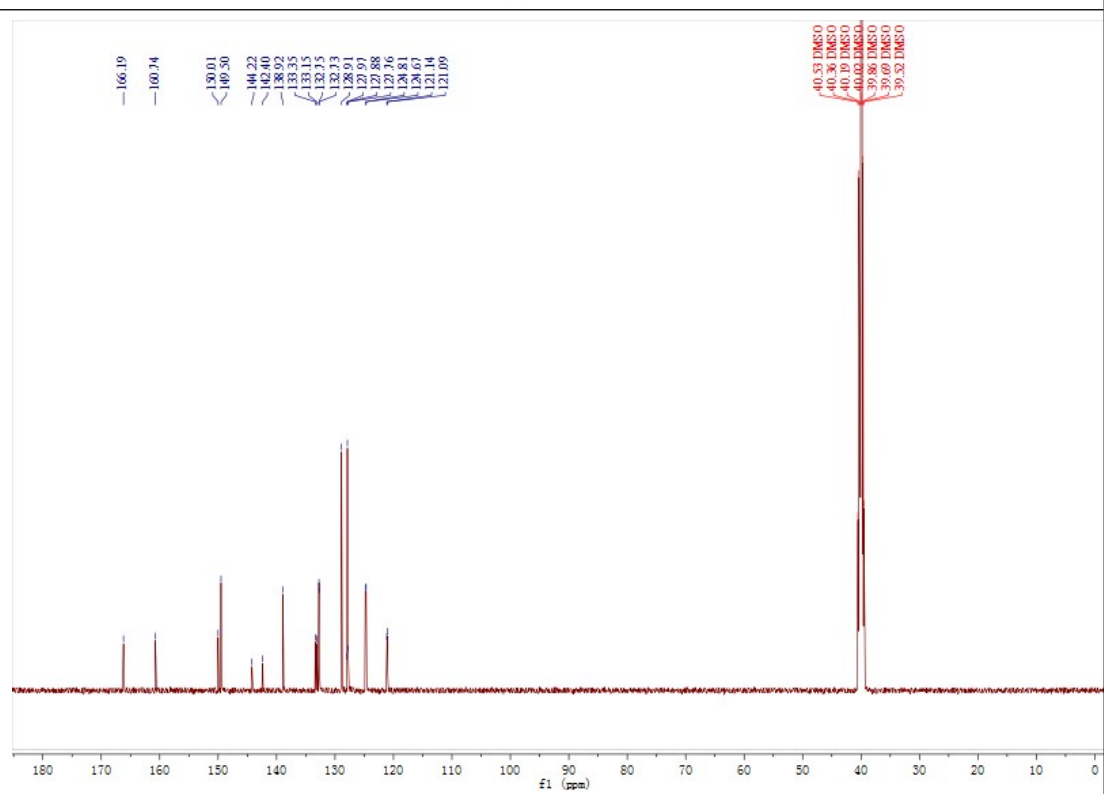

***N*-(4-oxo-4*H*-[1,2'-bipyridin]-2-yl)benzamide (3m)**

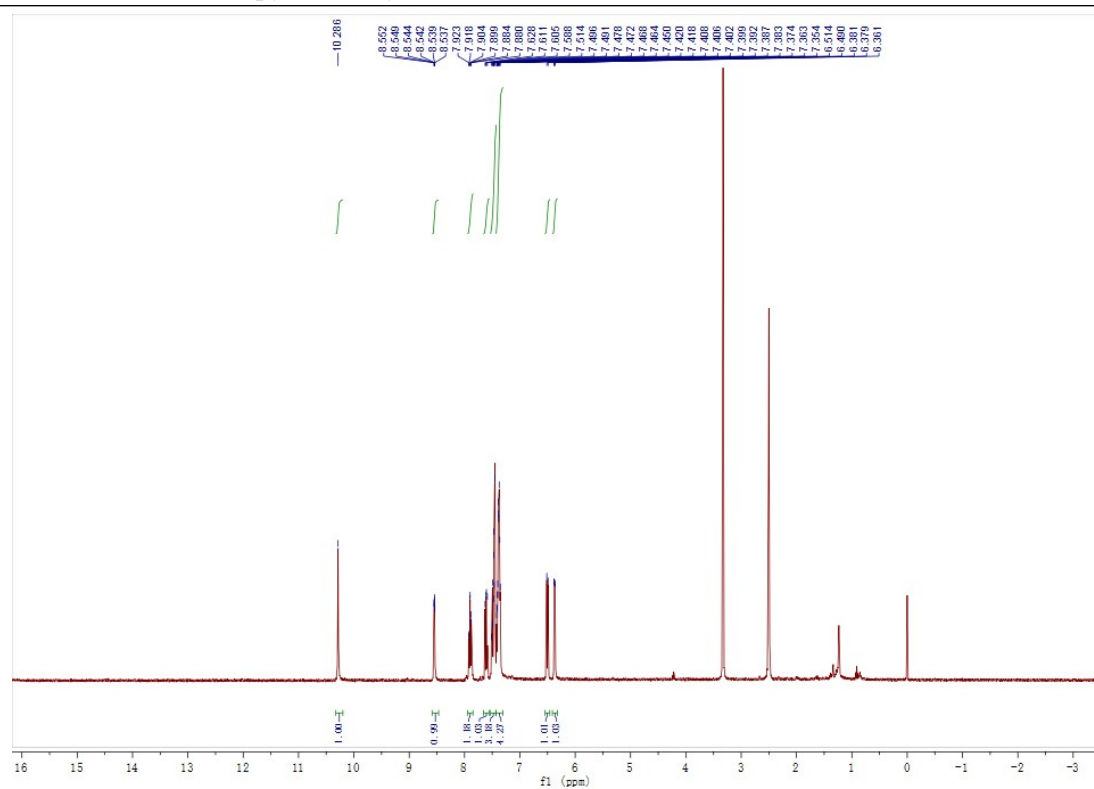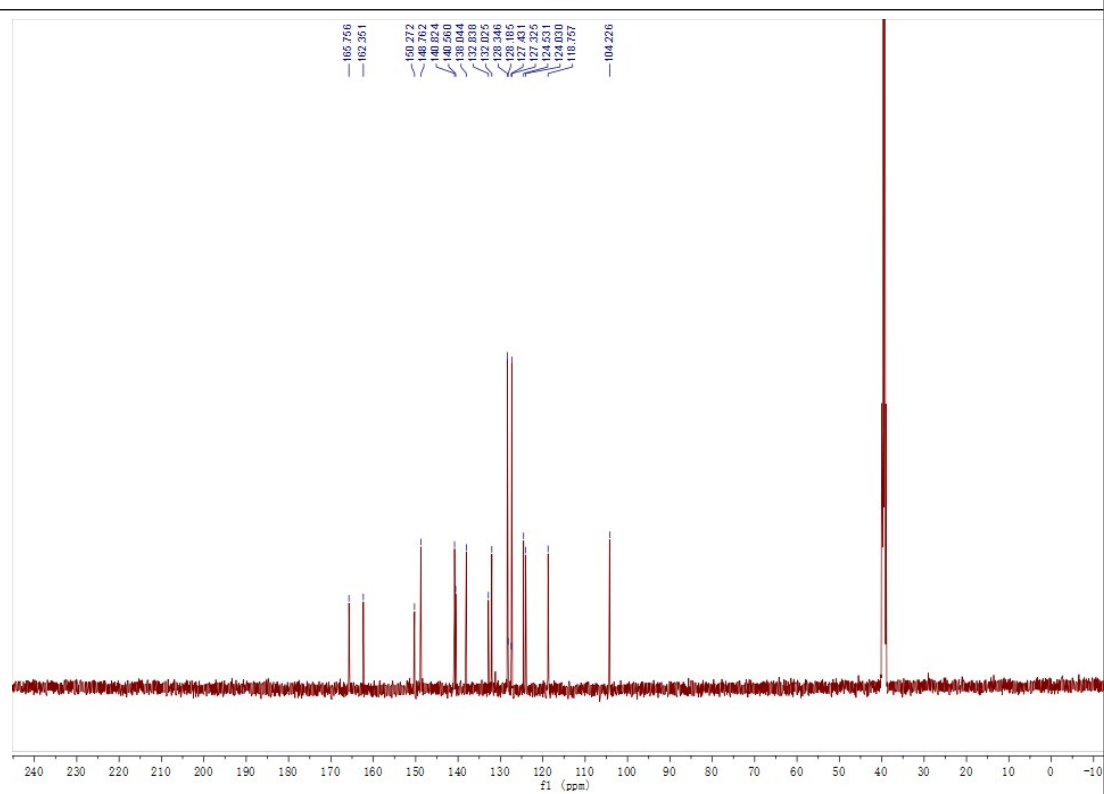

***N*-(1-oxo-2-(pyridin-2-yl)-1,2-dihydroisoquinolin-3-yl)benzamide (3n)**

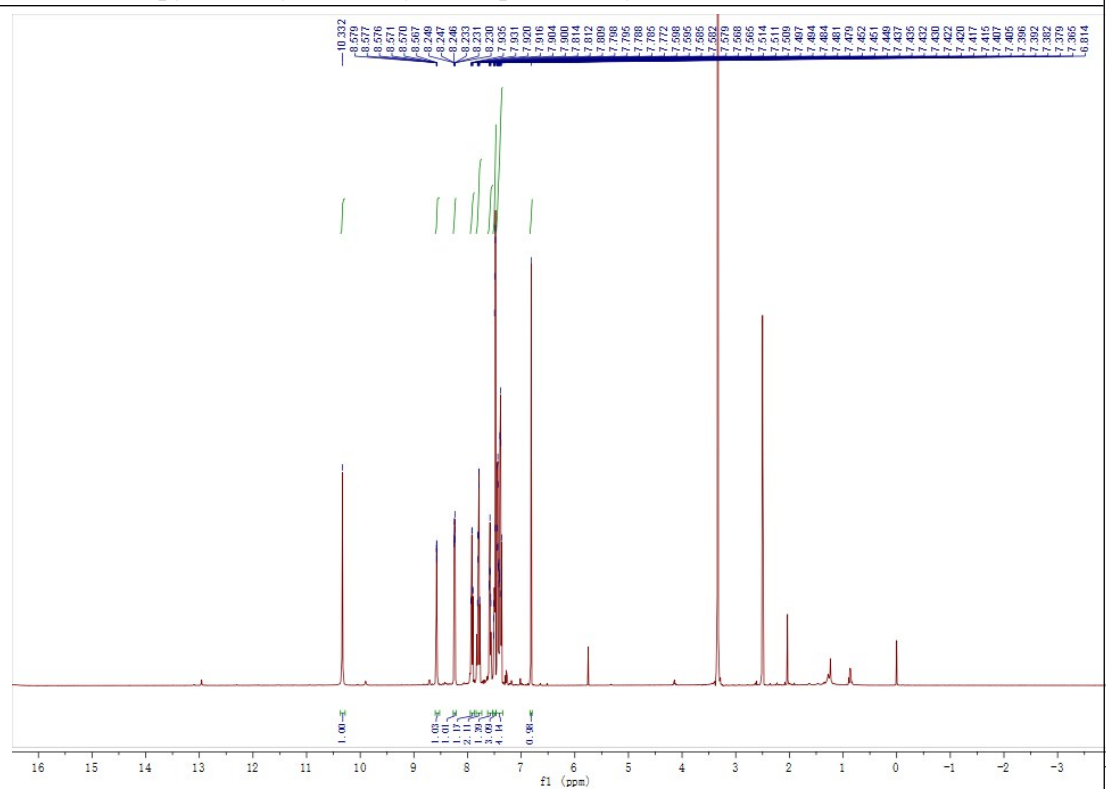

***N*-(6-bromo-1-oxo-2-(pyridin-2-yl)-1,2-dihydroisoquinolin-3-yl)benzamide (3o)**

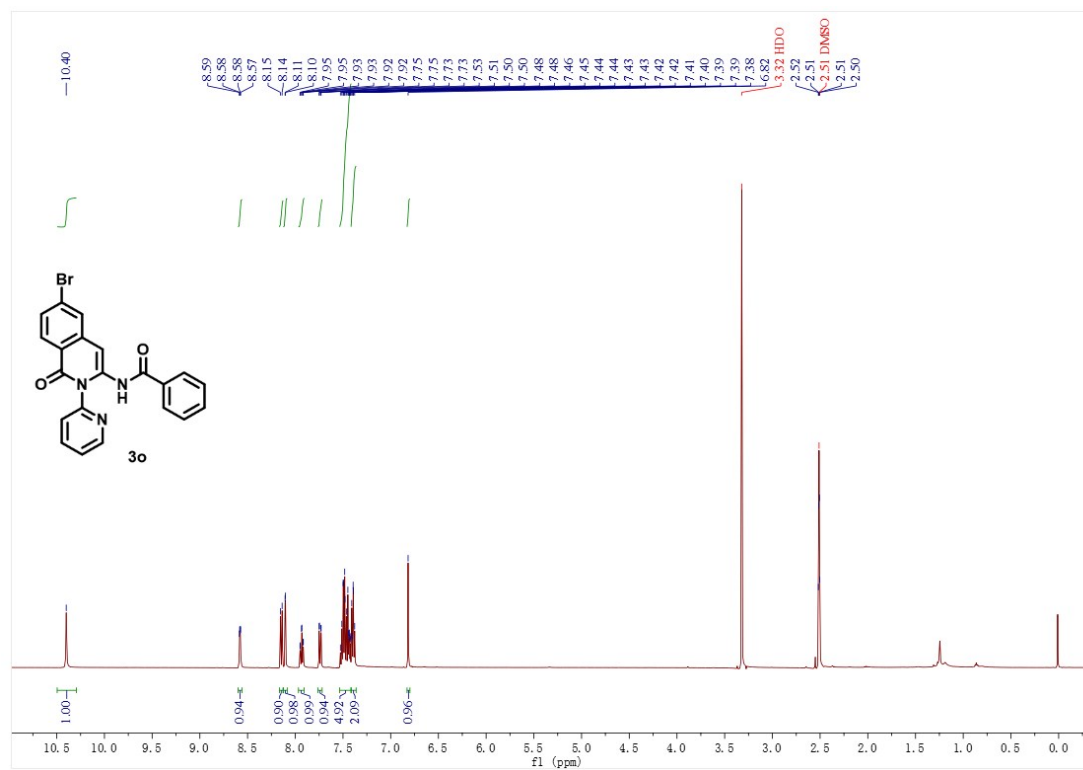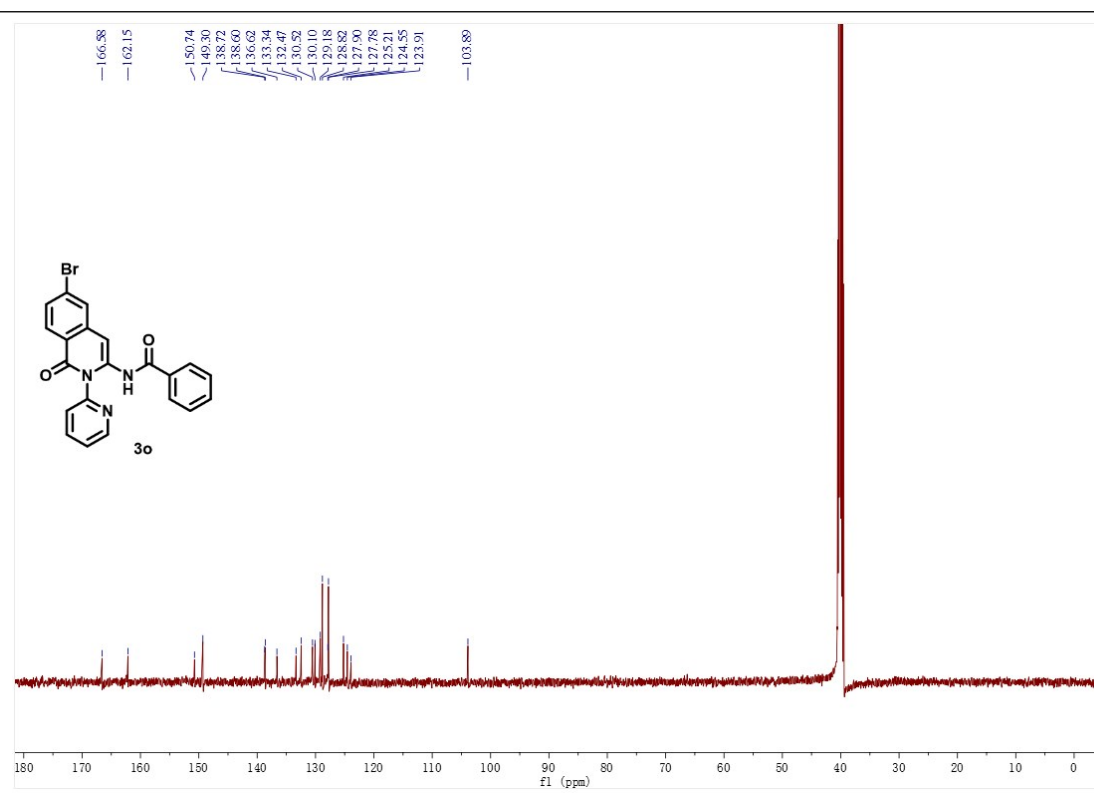

***N*-(7-bromo-1-oxo-2-(pyridin-2-yl)-1,2-dihydroisoquinolin-3-yl)benzamide (3p)**

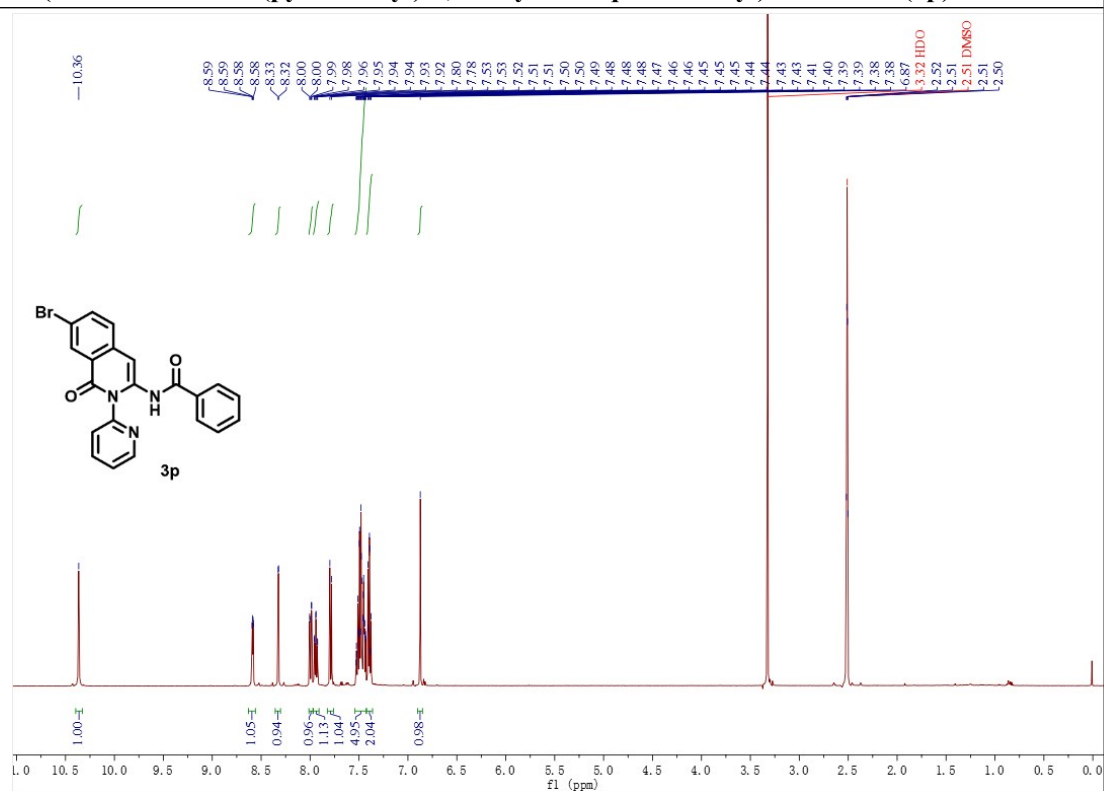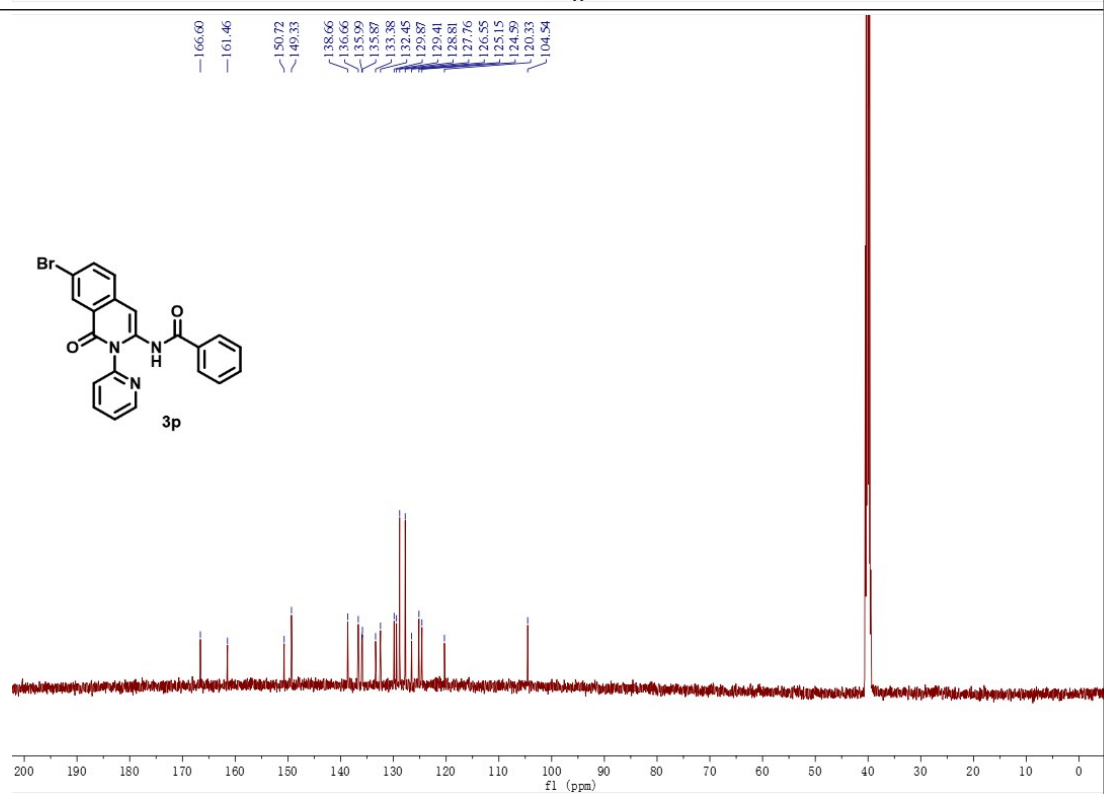

***N*-(6-methoxy-1-oxo-2-(pyridin-2-yl)-1,2-dihydroisoquinolin-3-yl)benzamide (3q)**

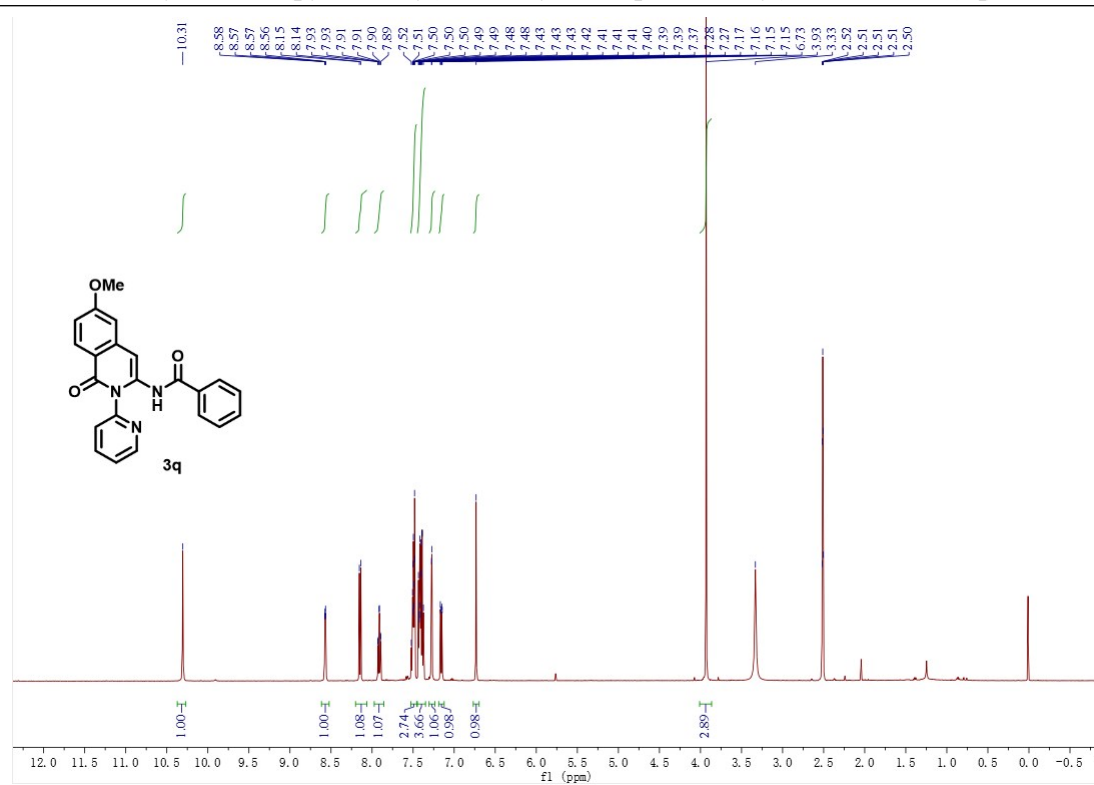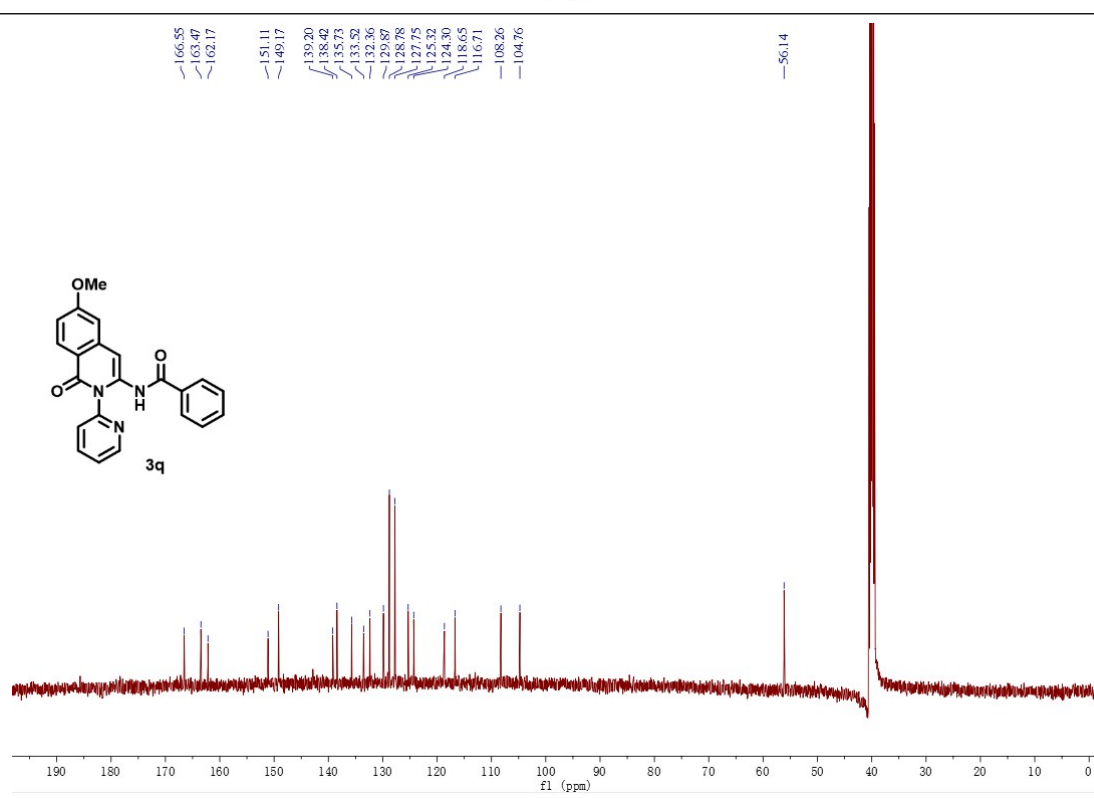



**4-Methyl-*N*-(2-oxo-2*H*-[1,2'-bipyridin]-6-yl)benzamide (4a)**

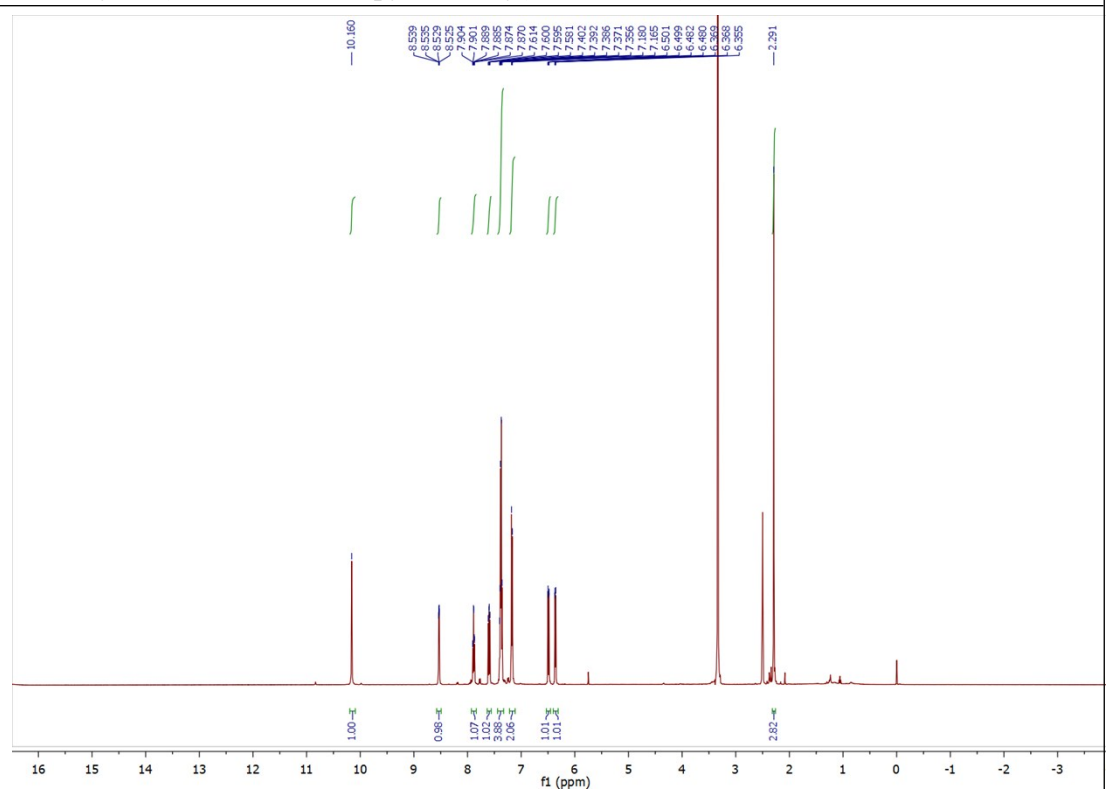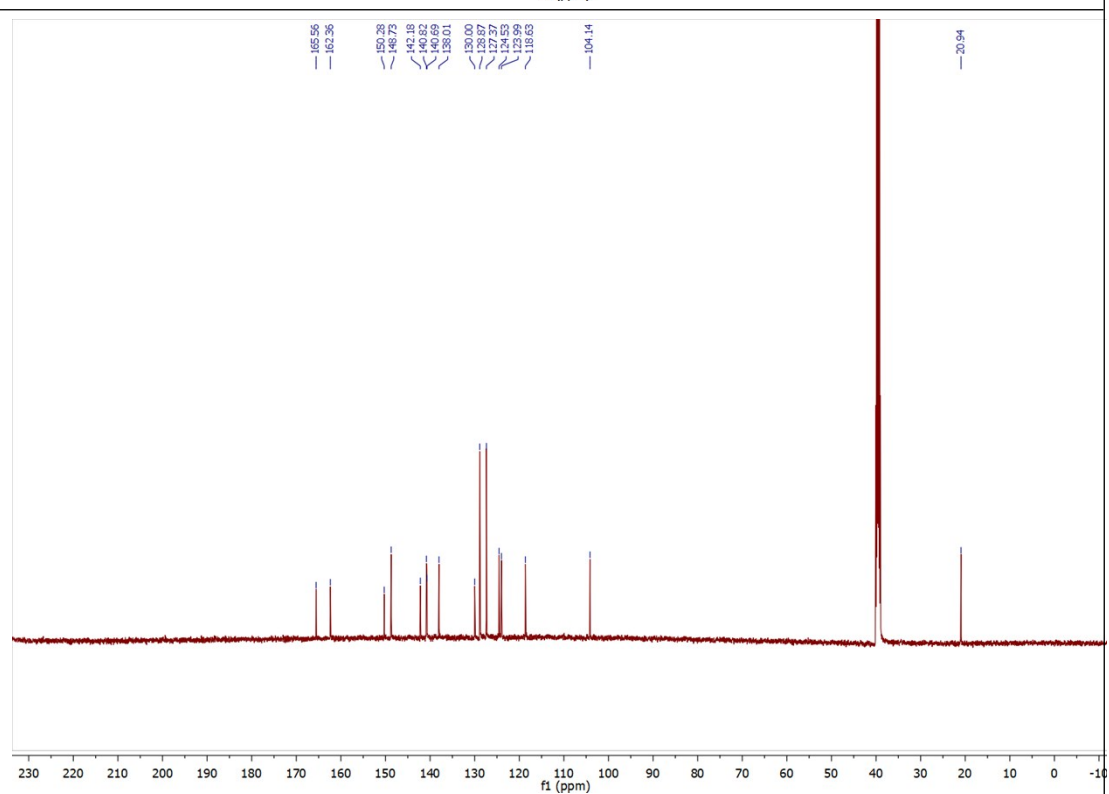

# 4-Methoxy-N-(2-oxo-2H-[1,2'-bipyridin]-6-yl)benzamide (4b)

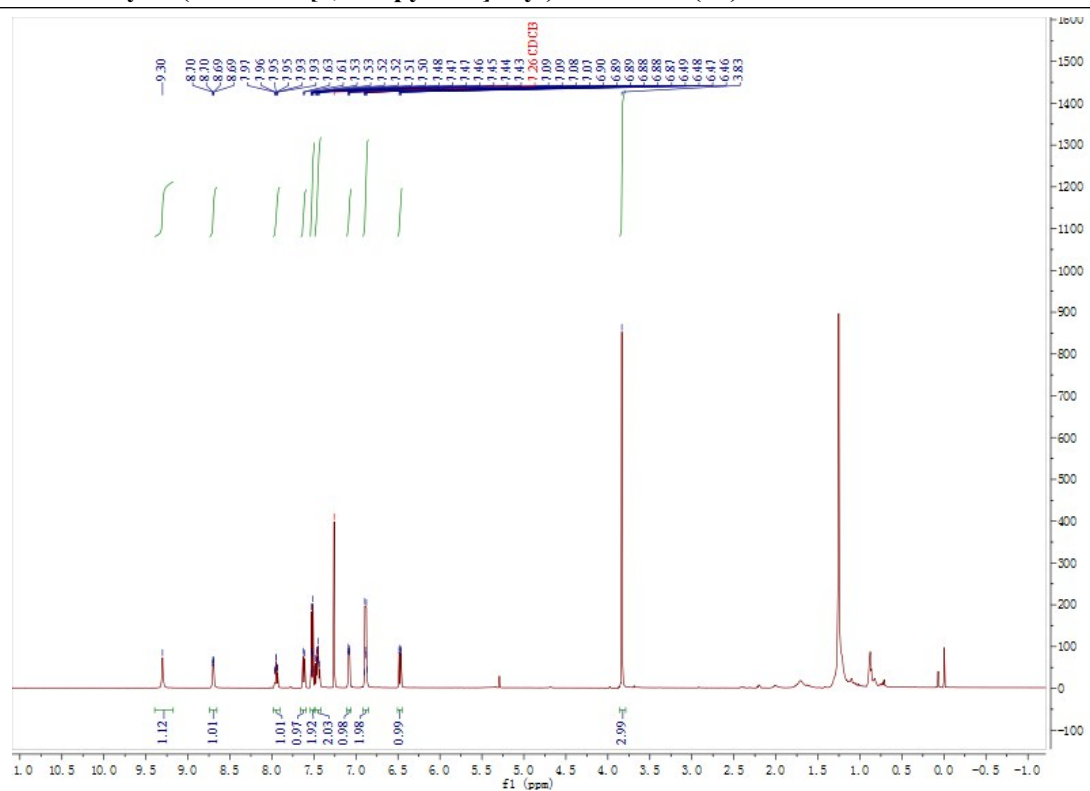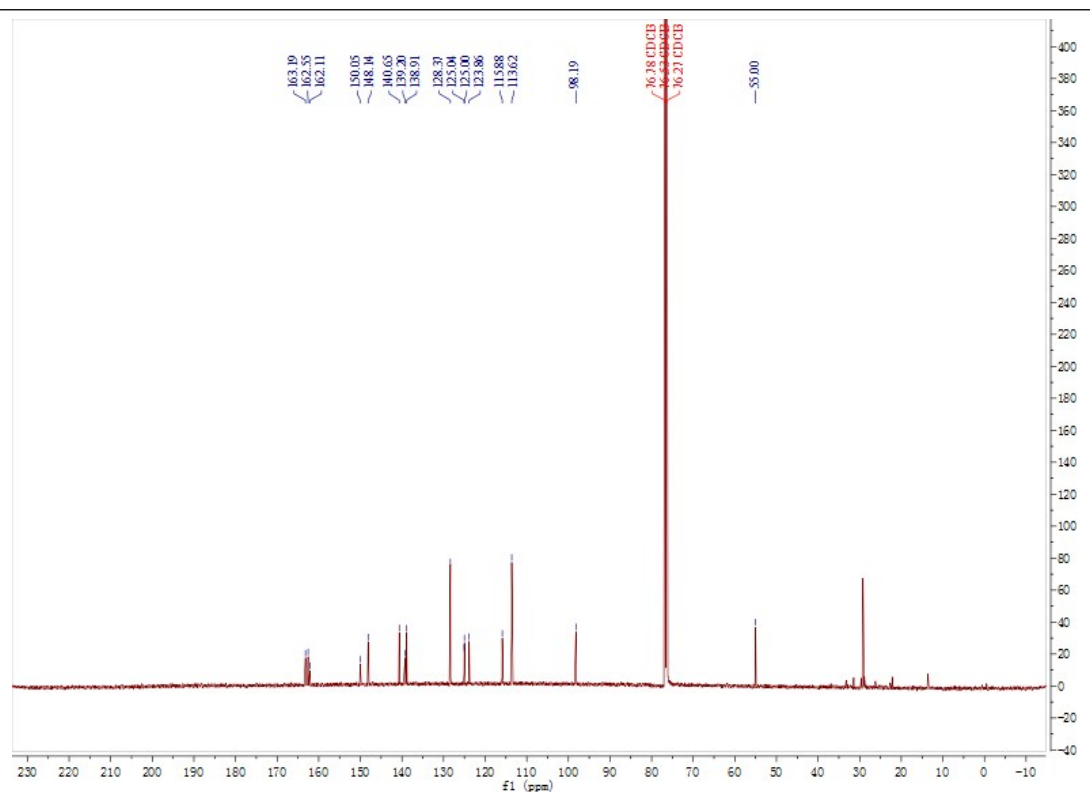

**4-Fluoro-*N*-(2-oxo-2*H*-[1,2'-bipyridin]-6-yl)benzamide (4c)**

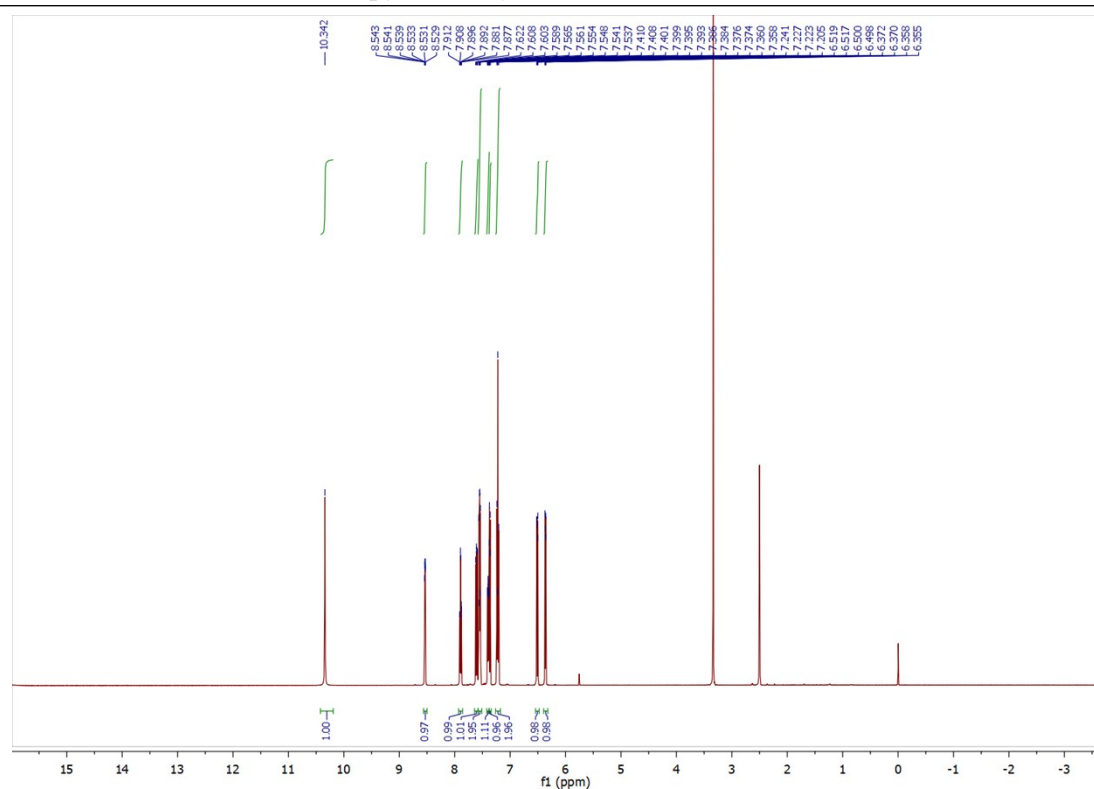

**4-Chloro-*N*-(2-oxo-2*H*-[1,2'-bipyridin]-6-yl)benzamide (4d)**

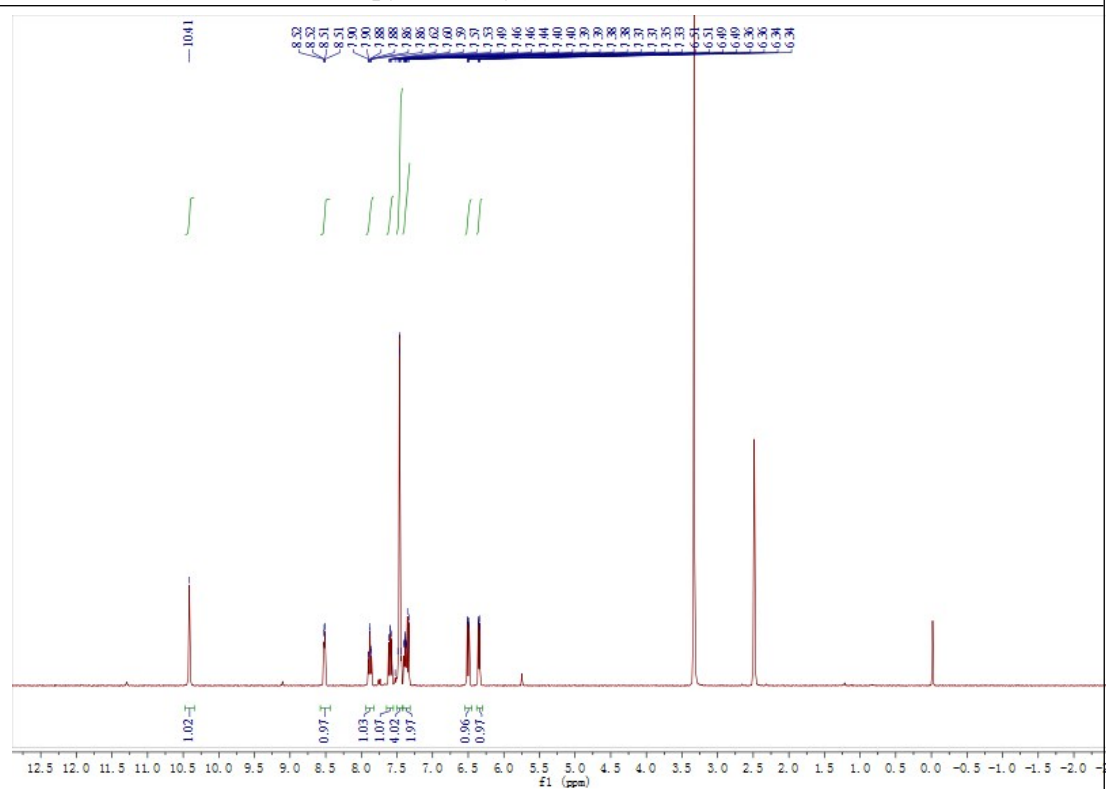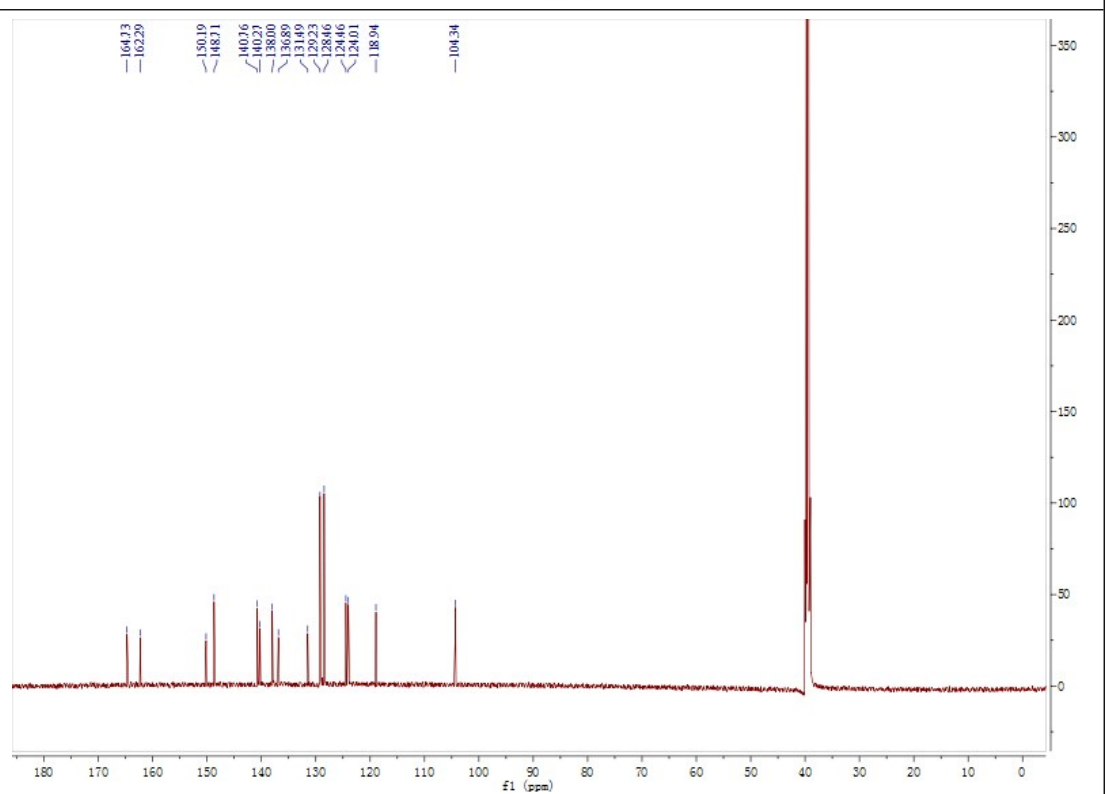

### 3-Methyl-*N*-(2-oxo-2*H*-[1,2'-bipyridin]-6-yl)benzamide (4e)

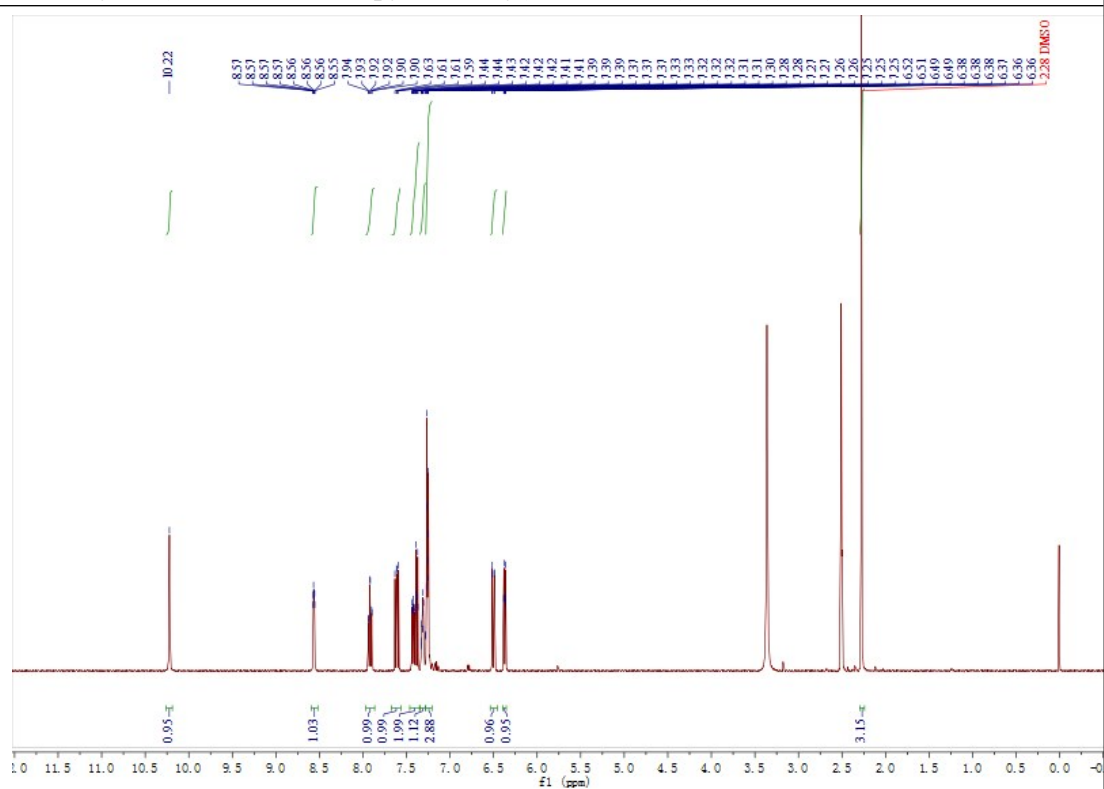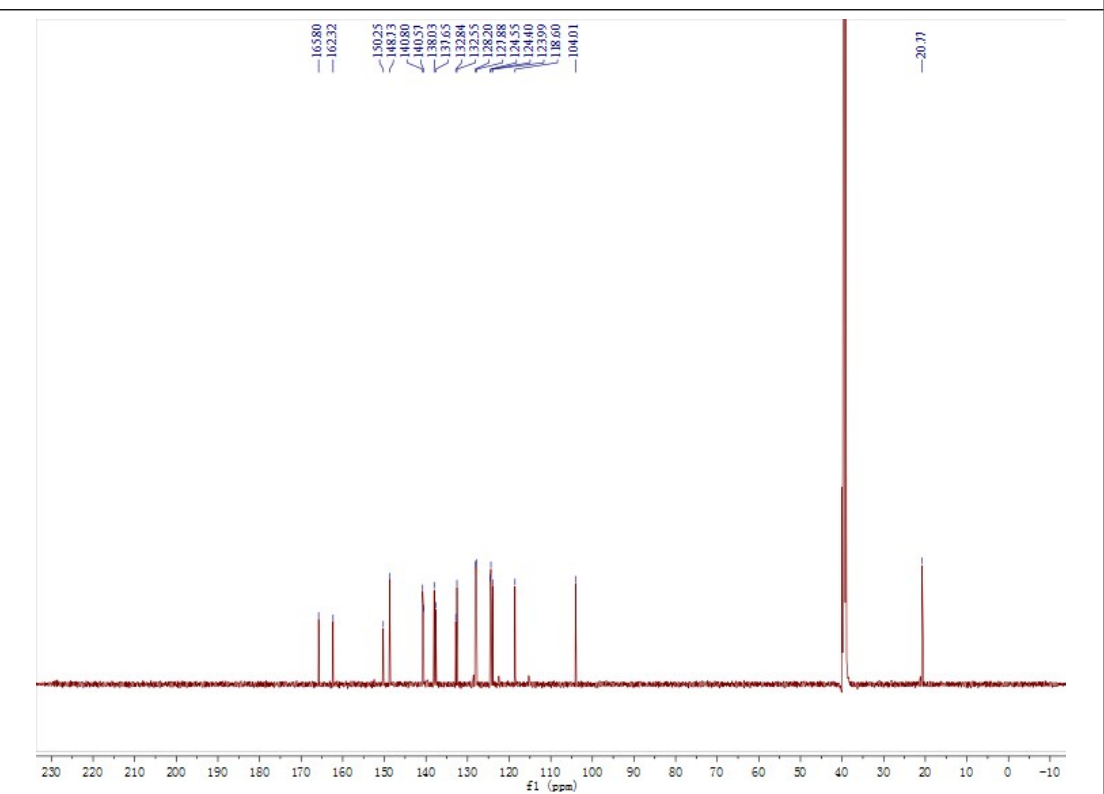

10.251  
8.567  
8.565  
8.502  
8.500  
8.555  
8.553  
8.549  
8.548  
7.934  
7.929  
7.914  
7.910  
7.885  
7.880  
7.872  
7.811  
7.805  
7.567  
7.435  
7.433  
7.423  
7.271  
7.271  
7.417  
7.414  
7.405  
7.402  
7.381  
7.361  
7.306  
7.285  
7.267  
7.070  
7.068  
7.064  
7.061  
7.048  
7.044  
7.041  
7.029  
7.026  
7.023  
6.950  
6.946  
6.944  
6.940  
6.517  
6.514  
6.494  
6.491  
6.352  
6.379  
6.365  
6.352  
3.720

1.00H  
1.00H  
0.96H  
3.04H

f1 (ppm)

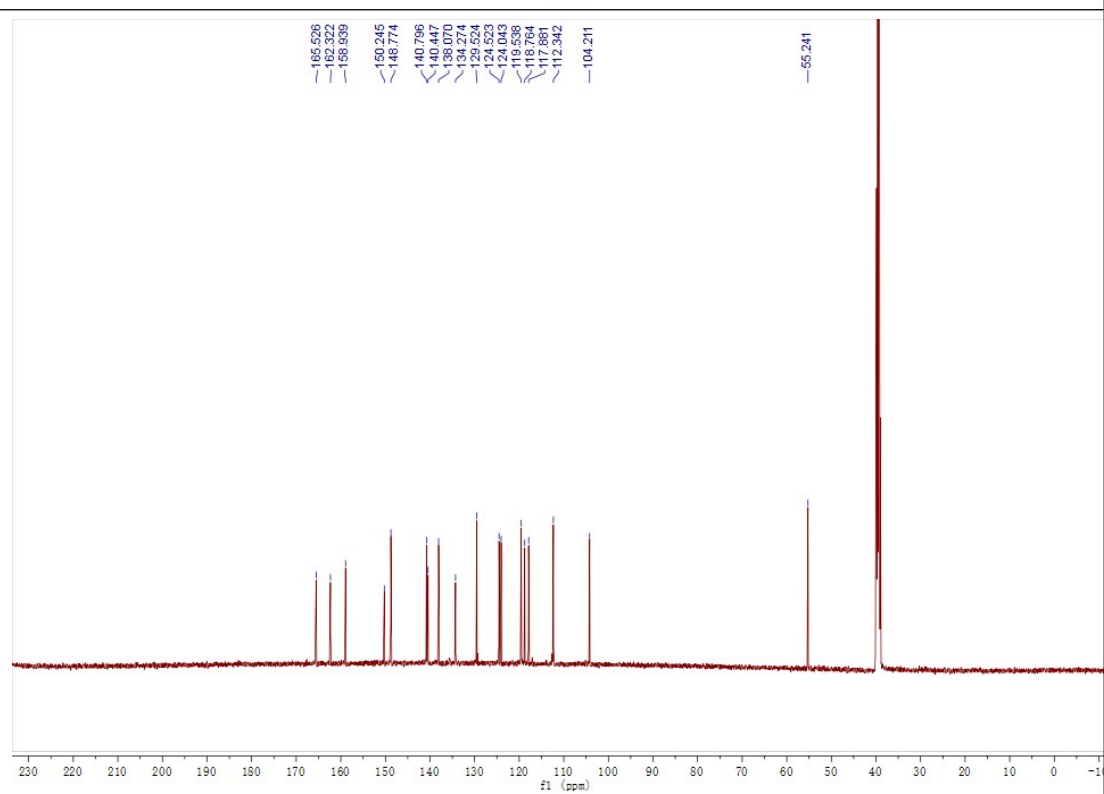

The figure displays two NMR spectra for compound 1. The top spectrum is the  $^1\text{H}$  NMR spectrum, recorded in  $\text{CDCl}_3$ , showing chemical shifts from -3 to 16 ppm. The x-axis is labeled 'f1 (ppm)'. The spectrum features several peaks: a broad peak at approximately 10.4 ppm (integral 0.96), a multiplet between 7.5 and 8.5 ppm (integrals 1.01, 2.07, 3.98, 1.04), a multiplet between 6.5 and 7.0 ppm (integrals 0.99, 0.99), a sharp singlet at approximately 3.0 ppm, a sharp singlet at approximately 2.5 ppm, and a sharp singlet at approximately 0.1 ppm. The bottom spectrum is the  $^{13}\text{C}$  NMR spectrum, recorded in  $\text{CDCl}_3$ , showing chemical shifts from -10 to 160 ppm. The x-axis is labeled 'f1 (ppm)'. The spectrum shows a cluster of peaks between 120 and 160 ppm, a sharp singlet at approximately 40 ppm, and a sharp singlet at approximately -10 ppm. Both spectra include integration curves and numerical values for each peak.

**3-Bromo-*N*-(2-oxo-2*H*-[1,2'-bipyridin]-6-yl)benzamide (4h)**

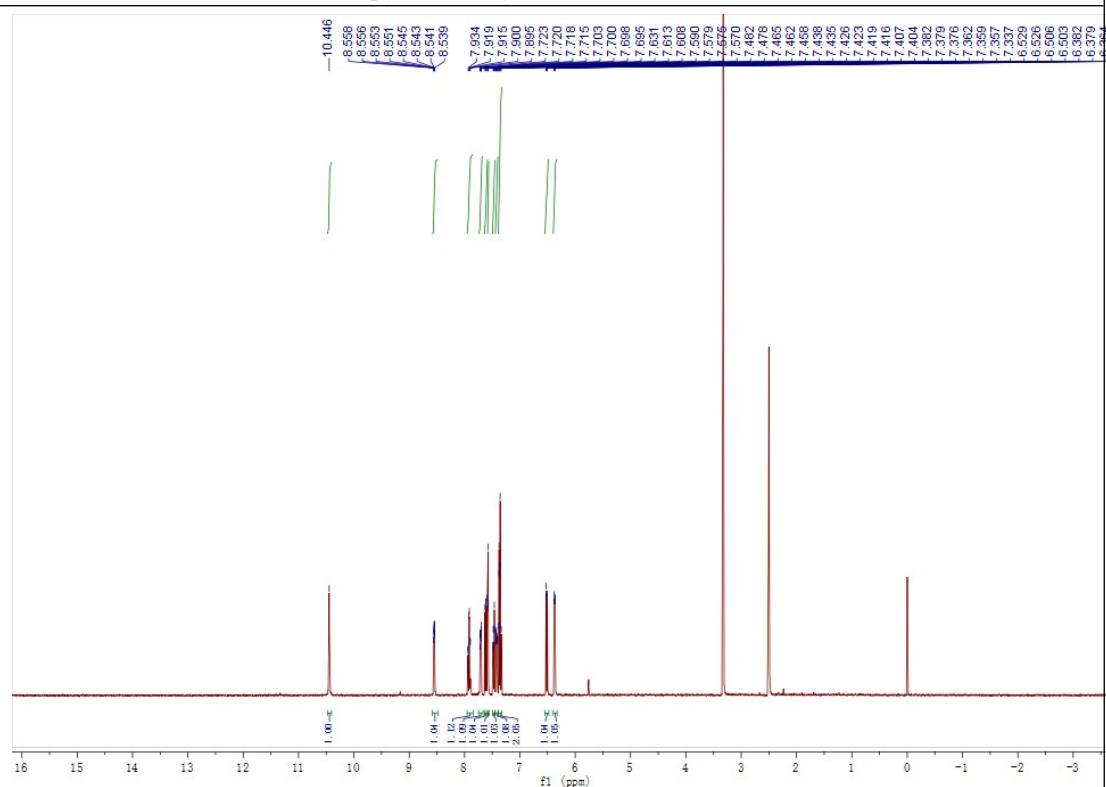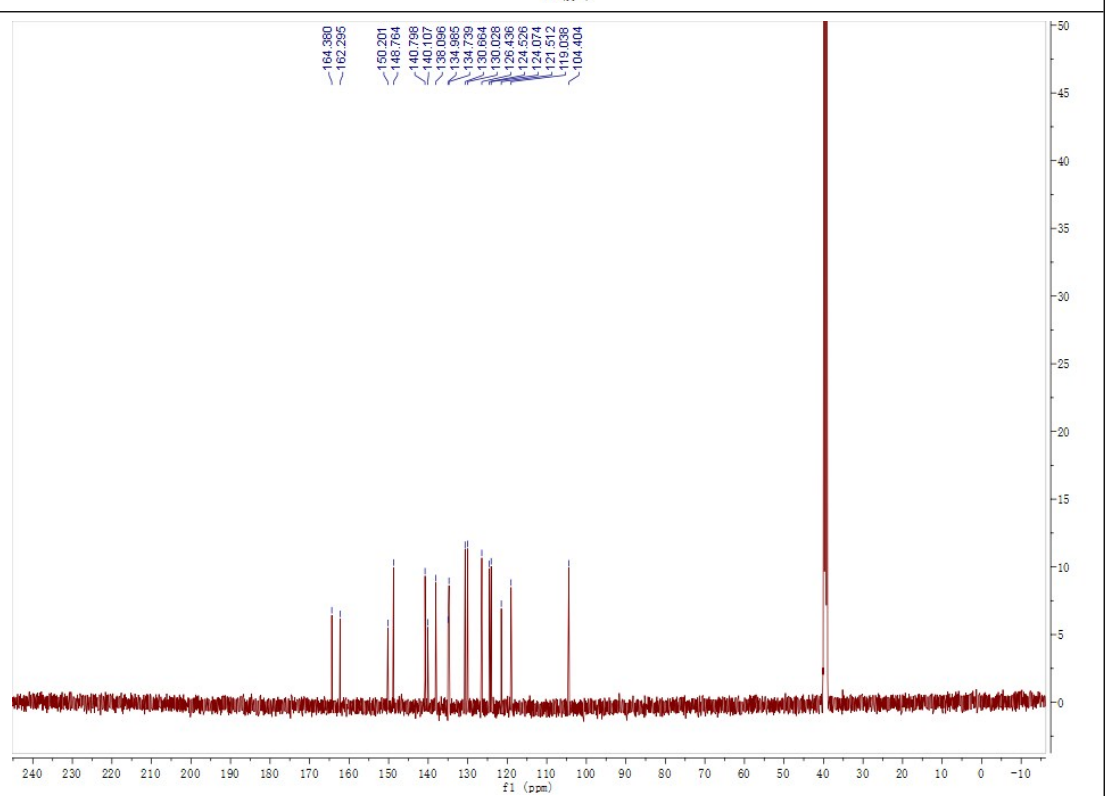



[illegible]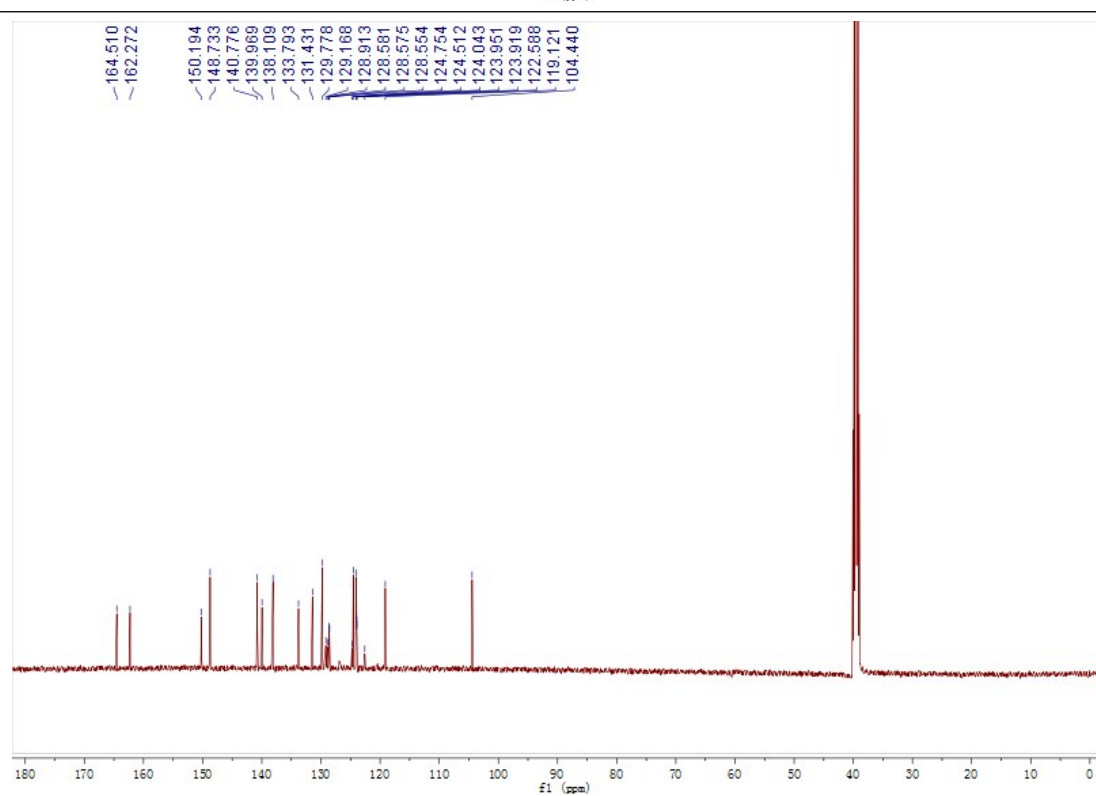

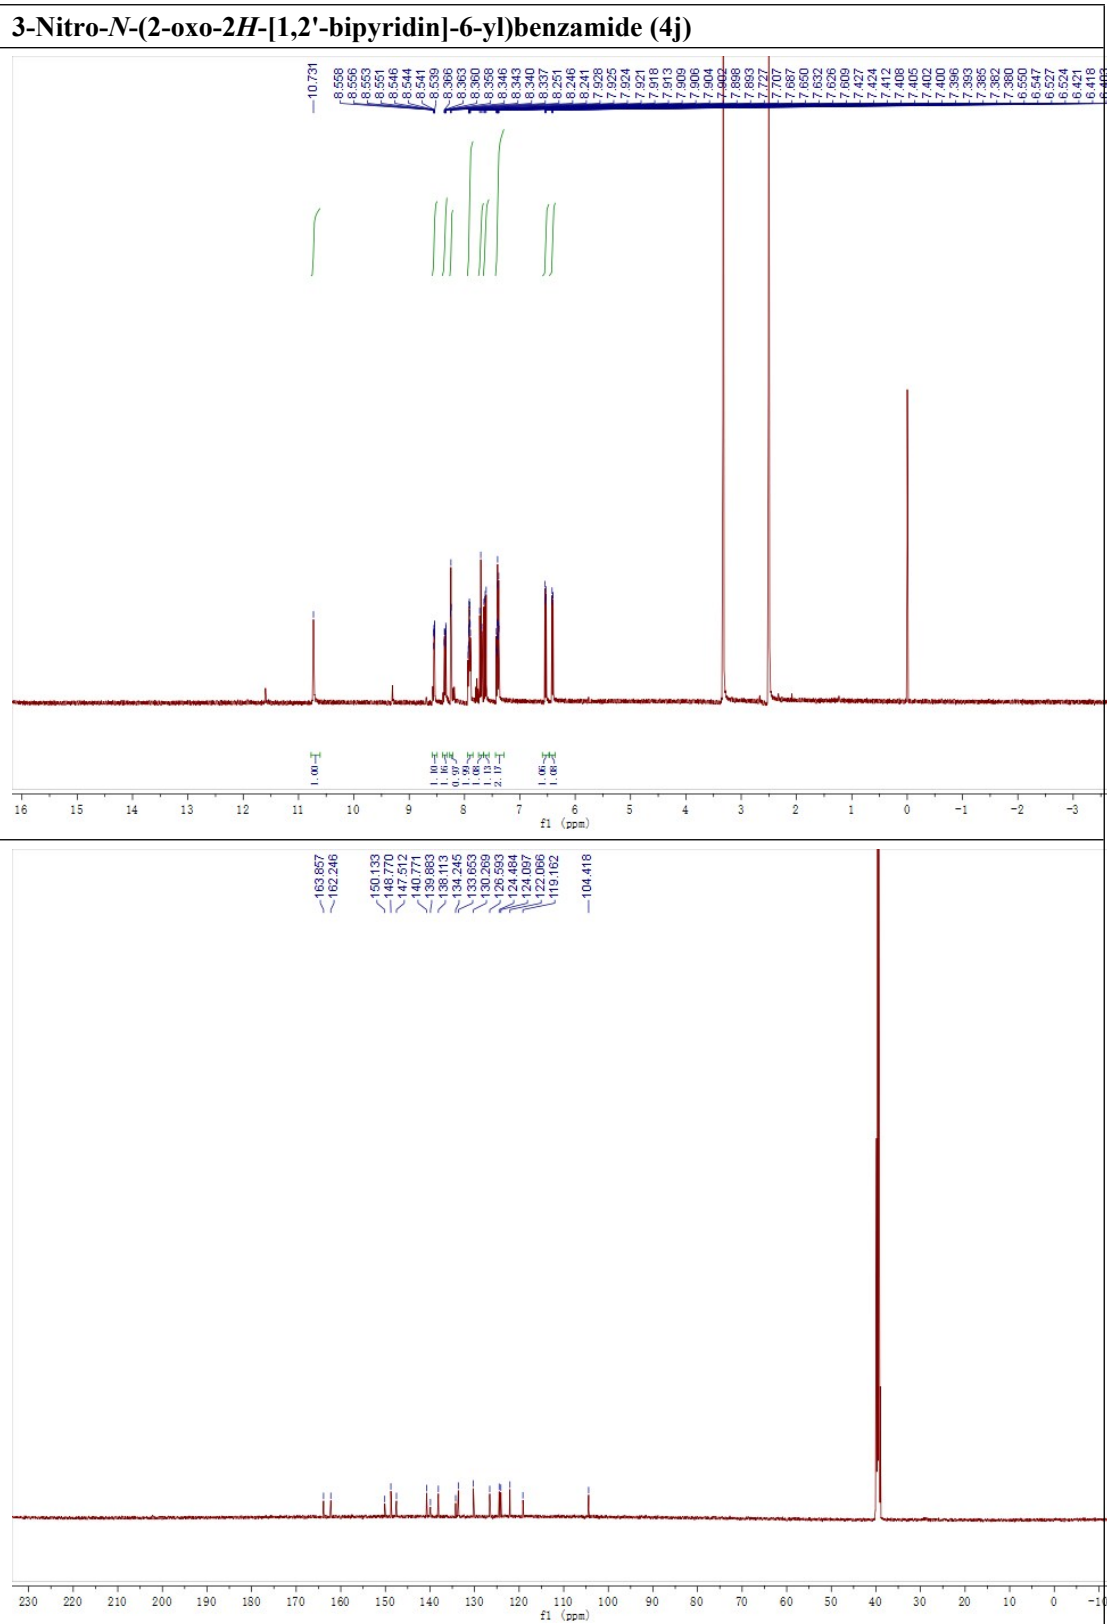

**2-Fluoro-*N*-(2-oxo-2*H*-[1,2'-bipyridin]-6-yl)benzamide (4k)**

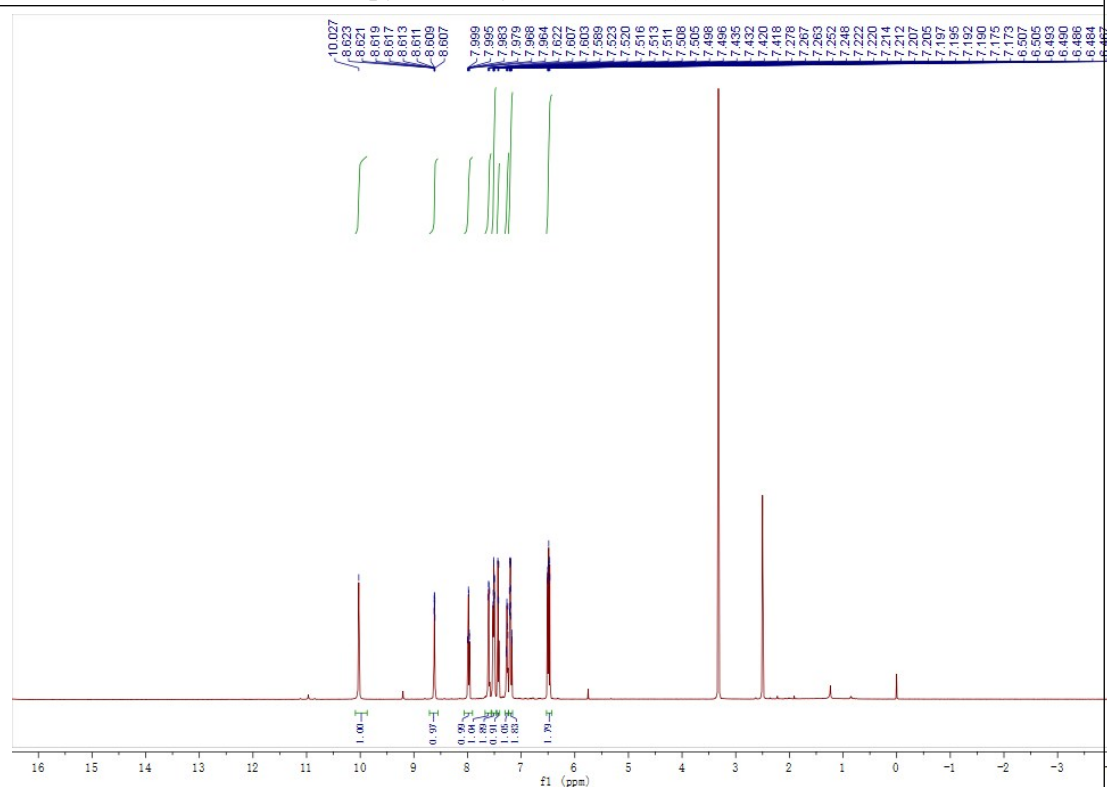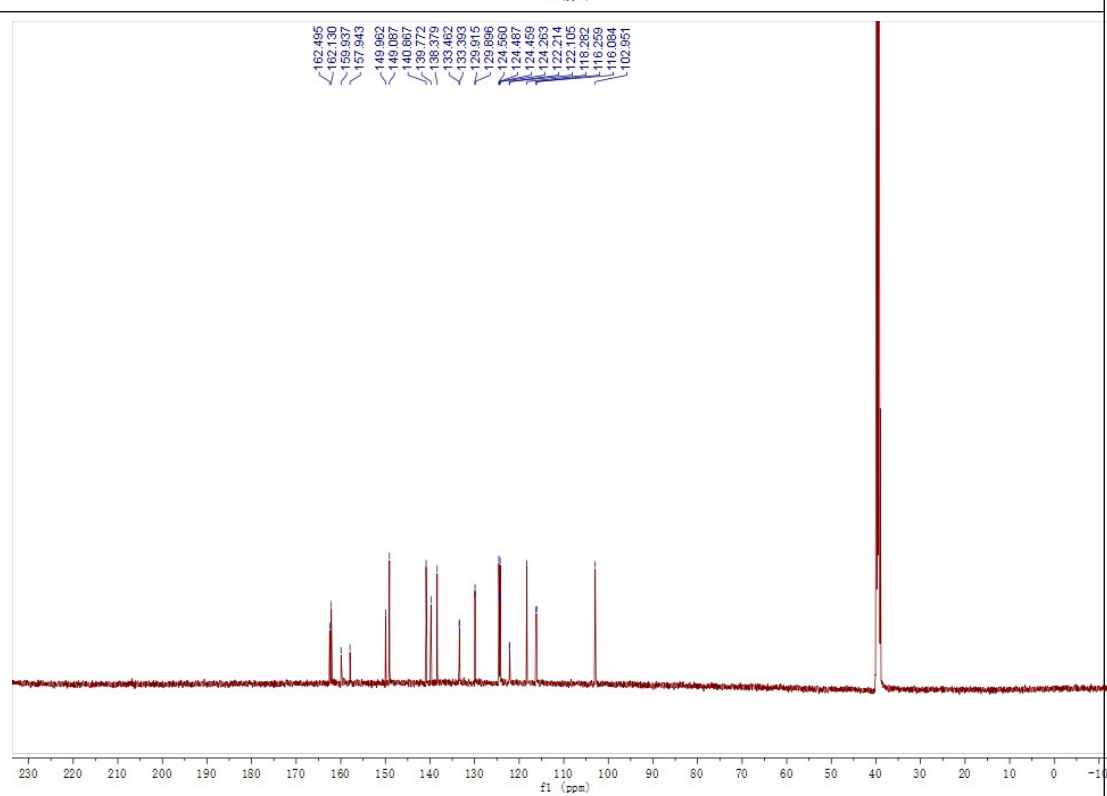

***N*-(2-oxo-2*H*-[1,2'-bipyridin]-6-yl)thiophene-2-carboxamide (4l)**

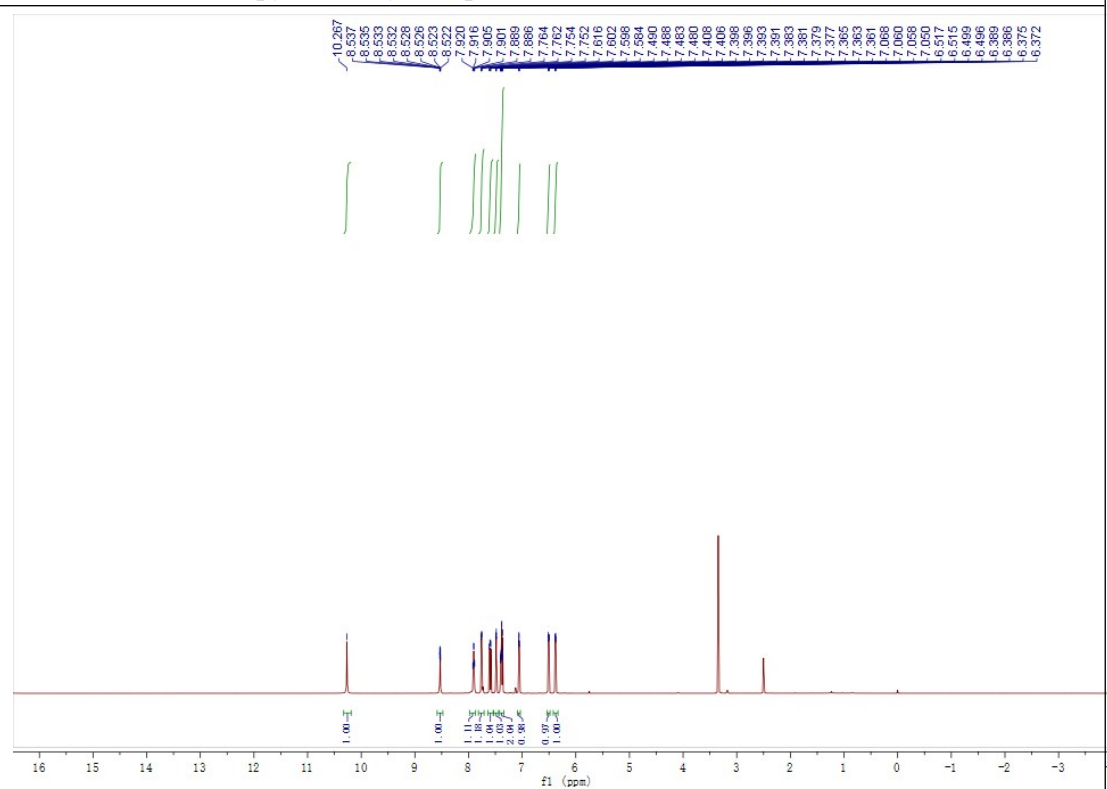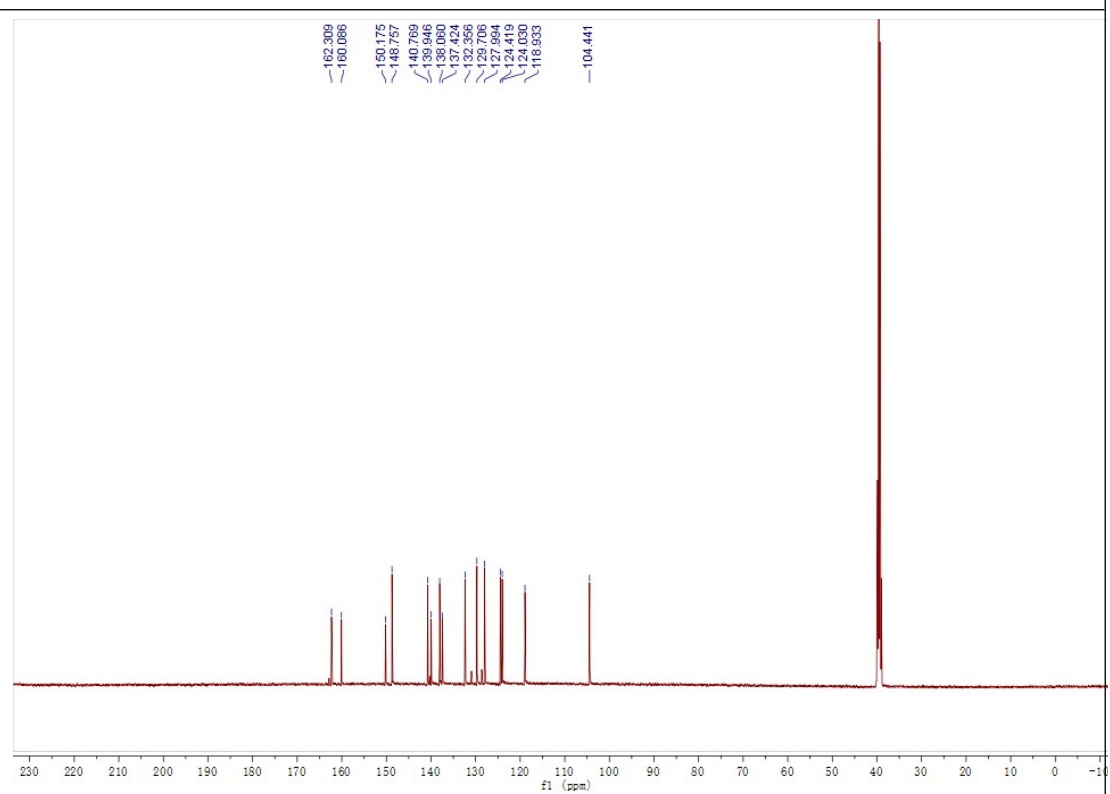

***N*-(2-oxo-2*H*-[1,2'-bipyridin]-6-yl)acetamide (4m)**

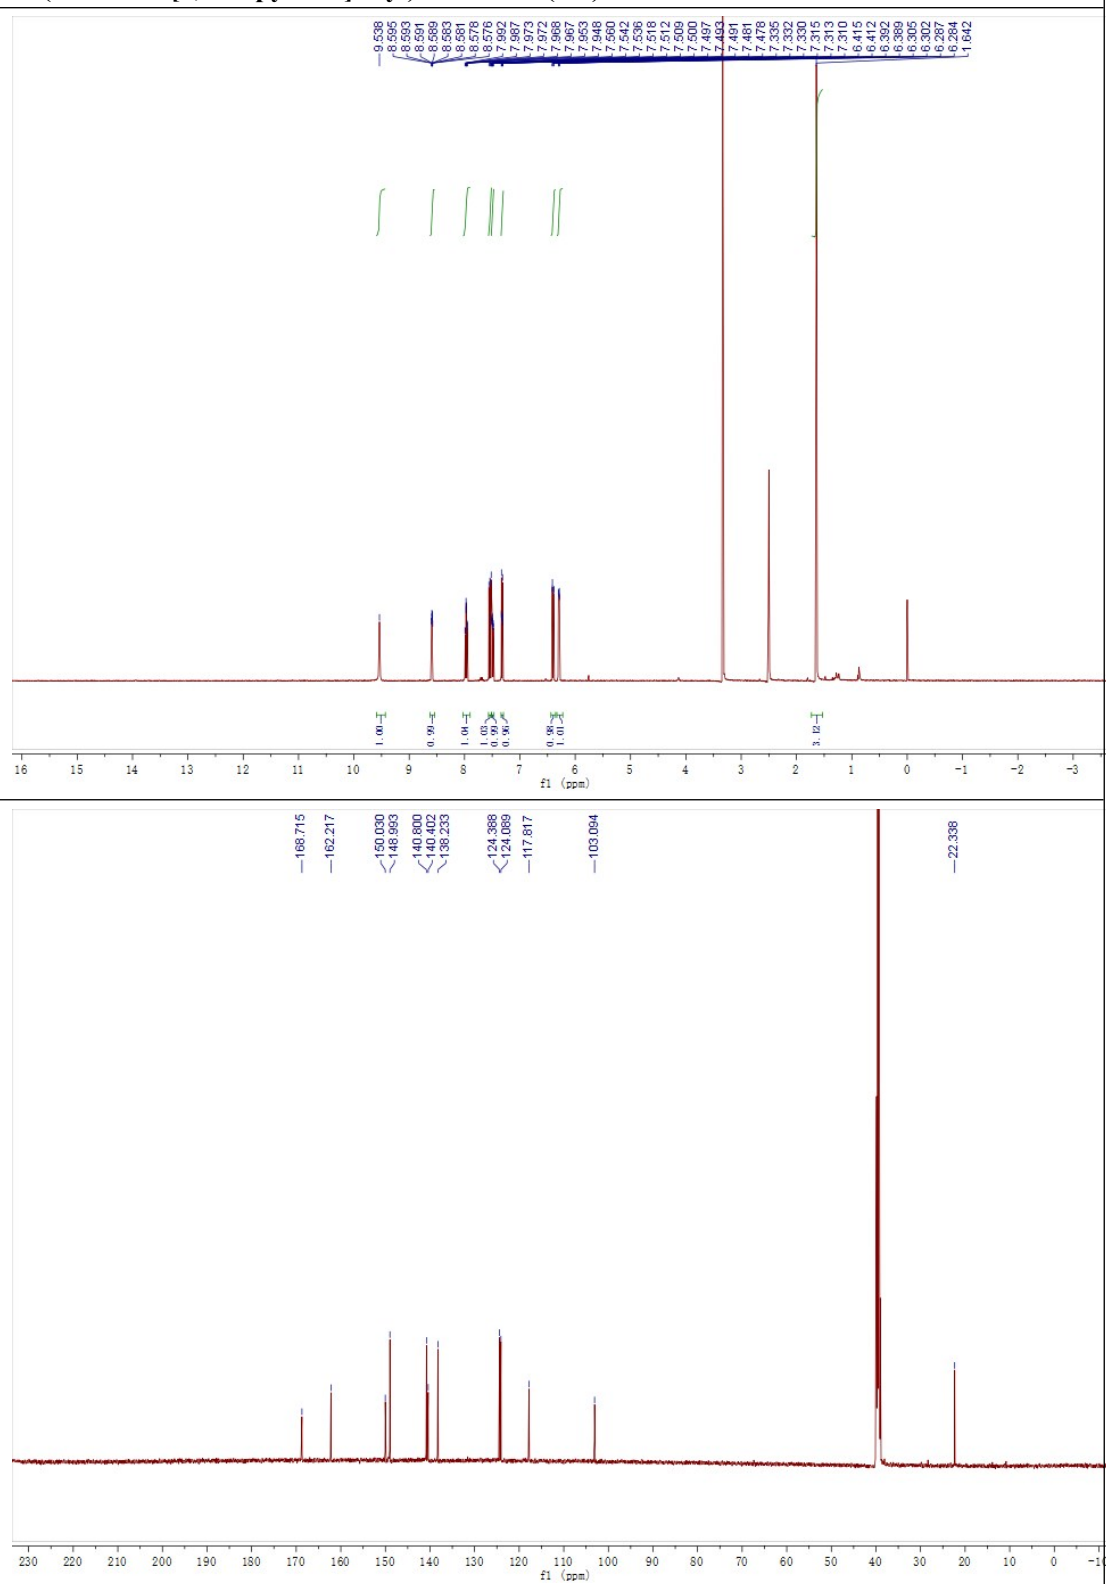

Supplement: c8ra06716c1.pdf [file c8ra06716c1.pdf]
